1  
2  
3  
4  
5  
6  
7  
8  
9  
10  
11  
12  
13  
14  
15  
16  
17  
18  
19  
20  
21  
22  
23  
24  
25

## High-throughput identification of prefusion-stabilizing mutations in SARS-CoV-2 spike

Timothy J.C. Tan<sup>1</sup>, Zongjun Mou<sup>2</sup>, Ruipeng Lei<sup>3</sup>, Wenhao O. Ouyang<sup>3</sup>, Meng Yuan<sup>4</sup>, Ge Song<sup>5,6,7</sup>, Raiees Andrabi<sup>5,6,7</sup>, Ian A. Wilson<sup>4,6,7,8</sup>, Collin Kieffer<sup>9</sup>, Xinghong Dai<sup>2</sup>, Kenneth A. Matreyek<sup>10</sup>, Nicholas C. Wu<sup>1,3,11,12,§</sup>

<sup>1</sup> Center for Biophysics and Quantitative Biology, University of Illinois at Urbana-Champaign, Urbana, IL 61801, USA

<sup>2</sup> Department of Physiology and Biophysics, Case Western Reserve University School of Medicine, Cleveland, OH 44106, USA

<sup>3</sup> Department of Biochemistry, University of Illinois at Urbana-Champaign, Urbana, IL 61801, USA

<sup>4</sup> Department of Integrative Structural and Computational Biology, The Scripps Research Institute, La Jolla, CA 92037, USA

<sup>5</sup> Department of Immunology and Microbiology, The Scripps Research Institute, La Jolla, CA 92037, USA

<sup>6</sup> IAVI Neutralizing Antibody Center, The Scripps Research Institute, La Jolla, CA 92037, USA

<sup>7</sup> Consortium for HIV/AIDS Vaccine Development (CHAVD), The Scripps Research Institute, La Jolla, CA 92037, USA

<sup>8</sup> The Skaggs Institute for Chemical Biology, The Scripps Research Institute, La Jolla, CA 92037, USA

<sup>9</sup> Department of Microbiology, University of Illinois at Urbana-Champaign, Urbana, IL 61801, USA

26 <sup>10</sup> Department of Pathology, Case Western Reserve University School of Medicine, Cleveland,  
27 OH 44106, USA

28 <sup>11</sup> Carl R. Woese Institute for Genomic Biology, University of Illinois at Urbana-Champaign,  
29 Urbana, IL 61801, USA

30 <sup>12</sup> Carle Illinois College of Medicine, University of Illinois at Urbana-Champaign, Urbana, IL 61801,  
31 USA

32 <sup>§</sup> Correspondence: [nicwu@illinois.edu](mailto:nicwu@illinois.edu) (N.C.W.)

33 **ABSTRACT**

34 Designing prefusion-stabilized SARS-CoV-2 spike is critical for the effectiveness of COVID-19  
35 vaccines. All COVID-19 vaccines in the US encode spike with K986P/V987P mutations to stabilize  
36 its prefusion conformation. However, contemporary methods on engineering prefusion-stabilized  
37 spike immunogens involve tedious experimental work and heavily rely on structural information.  
38 Here, we established a systematic and unbiased method of identifying mutations that  
39 concomitantly improve expression and stabilize the prefusion conformation of the SARS-CoV-2  
40 spike. Our method integrated a fluorescence-based fusion assay, mammalian cell display  
41 technology, and deep mutational scanning. As a proof-of-concept, this method was applied to a  
42 region in the S2 domain that includes the first heptad repeat and central helix. Our results revealed  
43 that besides K986P and V987P, several mutations simultaneously improved expression and  
44 significantly lowered the fusogenicity of the spike. As prefusion stabilization is a common  
45 challenge for viral immunogen design, this work will help accelerate vaccine development against  
46 different viruses.

## 47 INTRODUCTION

48 SARS-CoV-2 spike (S) glycoprotein, a homotrimeric class I fusion protein, naturally exists in a  
49 metastable, prefusion conformation on the virion surface<sup>1</sup>. Once the receptor-binding domain  
50 (RBD) of S transitions to an 'up' state and binds to the human angiotensin-converting enzyme II  
51 (hACE2) receptor<sup>2-4</sup>, a cascade of conformational changes is triggered to promote virus-host  
52 membrane fusion, and hence virus entry<sup>1,5-8</sup>. This conformational change, which involves  
53 structural rearrangement of the first heptad repeat (HR1) and central helix (CH), as well as the  
54 shedding of the S1 subunit, converts S into the postfusion conformation<sup>5-10</sup>. To inhibit virus entry  
55 and fusion, neutralizing antibodies target a variety of mainly conformational epitopes on the  
56 prefusion conformation of S<sup>11-15</sup>. Many of these conformational epitopes disappear or rearrange  
57 in the postfusion conformation, which instead can expose non-neutralizing epitopes that are  
58 immunodominant<sup>1</sup>. Consistently, antibody titer to the prefusion conformation has a strong  
59 correlation with neutralization potency, whereas that to the postfusion conformation does not<sup>16</sup>.  
60 Therefore, effective COVID-19 vaccines require S to be locked in the prefusion conformation to  
61 preserve the neutralizing epitopes.

62

63 The rapid development of prefusion-stabilized SARS-CoV-2 S during the early phase of COVID-  
64 19 pandemic has tremendously benefited from prior studies on prefusion-stabilizing mutations in  
65 the S proteins of related betacoronaviruses, namely MERS-CoV<sup>17,18</sup> and SARS-CoV<sup>18</sup>. These  
66 studies employed a structure-based approach to identify two prefusion-stabilizing mutations  
67 (K986P/V987P, SARS-CoV-2 numbering) at the HR1-CH junction<sup>17-19</sup>. Due to the structural  
68 similarities among the S proteins of MERS-CoV, SARS-CoV, and SARS-CoV-2, K986P/V987P  
69 were directly applied to engineer the prefusion-stabilized SARS-CoV-2 S during COVID-19  
70 vaccine development. For example, K986P/V987P are included in many nucleic acid- and protein  
71 subunit-based COVID-19 vaccines, such as those from Moderna<sup>20</sup>, Pfizer-BioNTech<sup>21</sup>, Johnson  
72 & Johnson-Janssen<sup>22</sup>, and Novavax<sup>23</sup>. Subsequent studies, which also used a structure-based

73 approach, identified additional mutations that further improve the expression and prefusion  
74 stability of SARS-CoV-2 S<sup>24-27</sup>. Nevertheless, identifying prefusion-stabilizing mutations using  
75 structure-based approach is time-consuming and likely not comprehensive, because it relies on  
76 low-throughput characterization of individual candidate mutants.

77

78 In this study, we developed a method to identify prefusion-stabilizing mutations of SARS-CoV-2  
79 S in a high-throughput and systematic manner, by coupling a fluorescence-based fusion assay,  
80 mammalian cell display technology, and deep mutational scanning (DMS). As a proof-of-concept,  
81 we screened all possible amino-acid mutations across the entire region spanning HR1 and CH.  
82 In addition to the K986P and V987P that are used in current COVID-19 vaccines, we identified  
83 several mutations that simultaneously improved expression and stabilized the prefusion  
84 conformation of both membrane-bound and soluble S. In this regard, our method circumvents the  
85 limitations of using structure-based approaches to engineer prefusion-stabilized S immunogens.

86

## 87 **RESULTS**

### 88 *Establishing a high-throughput fusion assay for SARS-CoV-2 S*

89 High-throughput assays for measuring protein mutant expression level in human cells have been  
90 developed in previous studies by one of our authors using landing pad cells<sup>28-30</sup>, which enable  
91 one cell to express one mutant, thereby providing a genotype-phenotype linkage<sup>31,32</sup>. Such assays  
92 have also been adopted to study the impact of N-terminal domain (NTD) mutations on SARS-  
93 CoV-2 S expression<sup>33</sup>. However, there is no similar assay for measuring fusogenicity.  
94 Conventional approaches for quantifying fusogenicity often rely on split fluorescent protein  
95 systems<sup>34-39</sup>, such as the split GFP system that consists of GFP<sub>1-10</sub> and GFP<sub>11</sub><sup>40</sup>. For example,  
96 when cells that express hACE2 and GFP<sub>1-10</sub> are mixed with cells expressing SARS-CoV-2 S and  
97 GFP<sub>11</sub>, fusion occurs, and the resultant syncytia fluoresce green. In this study, we pioneered an

98 approach by combining this fluorescence-based fusion assay with the use of landing pad cells to  
99 establish a high-throughput fusion assay that is compatible with DMS<sup>41</sup>.

100  
101 Specifically, we constructed a DMS library of membrane-bound S that was expressed by  
102 HEK293T landing pad cells, such that each cell would encode and express one S mutant. The  
103 DMS library contained all possible amino acid mutations from residues 883 to 1034, which covers  
104 HR1 (residues 912-984) and CH (residues 985-1034). All S-expressing cells also expressed  
105 mNeonGreen2<sub>11</sub> (mNG2<sub>11</sub>), which belongs to the split monomeric NeonGreen2 system<sup>42</sup>. At the  
106 same time, a stable cell line that expressed hACE2 and mNG2<sub>1-10</sub> was generated  
107 (**Supplementary Fig. 1**). For the rest of the study, unless otherwise stated, HEK293T landing  
108 pad cells that expressed S and mNG2<sub>11</sub> are abbreviated as “S-expressing cells” and those that  
109 expressed hACE2 and mNG2<sub>1-10</sub> are abbreviated as “hACE2-expressing cells”.

110  
111 When S-expressing cells were mixed with hACE2-expressing cells, S-expressing cells that  
112 encoded fusion-competent mutants would fuse with hACE2-expressing cells to form green-  
113 fluorescent syncytia (**Fig. 1a,c, see Methods**). In contrast, no fusion would occur with S-  
114 expressing cells that encoded fusion-incompetent mutants. Subsequently, fluorescence-activated  
115 cell sorting (FACS) was performed to separate the unfused cells and green-fluorescent syncytia,  
116 both of which were then analyzed by next-generation sequencing. The fusogenicity of each  
117 mutant could be quantified by comparing its frequency between the green-fluorescent syncytia  
118 sample and the unfused cell sample. In parallel, the expression level of each mutant was  
119 measured in a high-throughput manner as described previously<sup>28,33</sup> (**see Methods**).

120  
121 Prior to performing the DMS experiments above, the expression of membrane-bound S in  
122 HEK293T landing pad cells was verified via flow cytometry analysis using the RBD antibody  
123 CC12.3<sup>43</sup> (**Fig. 1b**). Moreover, the formation of green-fluorescent syncytia due to the fusion of S-

124 expressing cells and hACE2-expressing cells was also verified by microscopy and flow cytometry  
125 (**Fig. 1c,d, Supplementary Fig. 2a**). We further showed that such fusion can be inhibited by  
126 CC40.8, a neutralizing antibody to the stem helix of the S fusion machinery<sup>44</sup>, at the highest  
127 concentration tested (**Supplementary Fig. 2b**). This result confirmed that the fusion of S-  
128 expressing cells and hACE2-expressing cells was mediated by the S protein. We optimized the  
129 fusion assay to maximize the formation of green-fluorescent syncytia while minimizing the risk of  
130 clogging the cell sorter (**Supplementary Fig. 2c-e**).

131

### 132 *Identification of fusion-incompetent S mutations with high expression level*

133 From the DMS results, we computed the fusion score and expression score for each of the 2736  
134 missense mutations, 152 nonsense mutations, and 152 silent mutations (**see Methods**). A higher  
135 expression score indicates a higher S expression level. Similarly, a higher fusion score indicates  
136 higher fusogenicity. Both expression score and fusion score were normalized such that the  
137 average score of silent mutations was 1 and that of nonsense mutations was 0. Three and two  
138 biological replicates were performed for the high-throughput expression and fusion assays,  
139 respectively. The Pearson correlation coefficient of expression scores among replicates ranged  
140 from 0.72 to 0.79, whereas that of fusion scores between replicates was 0.61, confirming the  
141 reproducibility of our DMS experiments (**Extended Data Fig. 1a,b**). In addition, the expression  
142 score distribution and fusion score distribution of silent mutations were significantly different from  
143 those of nonsense mutations (**Extended Data Fig. 1c,d**), indicating that our DMS experiments  
144 could distinguish mutants with different expression and fusogenicity levels. The expression score  
145 and fusion score for individual mutations are shown in **Extended Data Fig. 2** and **Supplementary**  
146 **Table 1**.

147

148 Since our fusion assay measured the fusogenicity at the cell level rather than at the single  
149 molecule level, the fusion score would be influenced by the expression level even if the

150 fusogenicity per S molecule remained constant. Consistently, the fusion score positively  
151 correlated with the expression score (**Fig. 2a**). To correct for the effect of S expression level on  
152 fusogenicity, we computed an adjusted fusion score, which represented the residual of a linear  
153 regression model of fusion score on expression score (**Fig. 2b**). Mutations that had a low adjusted  
154 fusion score and a high expression score included the well-known prefusion-stabilizing mutations  
155 K986P and V987P that were used in current COVID-19 vaccines<sup>45,46</sup> (**Fig. 2b**), substantiating that  
156 our method could identify prefusion-stabilizing mutations.

157

158 Previous studies have shown that the expression of S with K986P/V987P can be improved by  
159 additional mutations<sup>24-27</sup>, as exemplified by an S construct known as HexaPro, which contains  
160 mutations F817P, A892P, A899P, A942P on top of K986P and V987P. Except for F817P, the  
161 other mutations in HexaPro were all present in our DMS library. Consistent with the original report  
162 of HexaPro<sup>24</sup>, our DMS data showed that A899P had minimal influence on S expression, whereas  
163 A892P and A942P noticeably increased S expression (**Fig. 2a,b**). These observations further  
164 validated our DMS data.

165

#### 166 *Validation and combinations of prefusion-stabilizing mutations*

167 Besides K986P and V987P, we also identified other mutations in HR1 and CH that had a low  
168 adjusted fusion score and a high expression score, particularly T961F, D994E, D994Q and  
169 Q1005R (**Fig. 2b,c**). Of note, D994E and D994Q were at the same residue position and  
170 chemically similar. By expressing these four mutations individually using HEK293T landing pad  
171 cells, we validated that they indeed improved the surface expression of S (**Fig. 3a, Extended**  
172 **Data Fig. 3a**) and prevented the formation of syncytia when incubated with hACE2-expressing  
173 cells (**Fig. 3d, Extended Data Fig. 4a,b**). Consistent with the DMS data (**Fig. 2**), the effects of  
174 T961F, D994E, D994Q and Q1005R on S expression and fusogenicity were comparable to  
175 K986P and V987P in the validation experiments. As a control, we also selected two mutations



176 that had a high adjusted fusion score and a high expression score, namely S943H and A944S  
177 (**Fig. 2b**), and validated their enhancement in S expression and fusogenicity (**Fig. 3b,e, Extended**  
178 **Data Fig. 3b, Extended Data Fig. 4c,d**).

179  
180 Subsequently, we combined the validated fusion-incompetent mutations K986P, V987P, D994Q  
181 and Q1005R to generate double (K986P/V987P: '2P'), triple (K986P/V987P/D994Q: '2PQ',  
182 K986P/V987P/Q1005R: '2PR') and quadruple (K986P/ V987P/D994Q/Q1005R: '2PQR') mutants  
183 of membrane-bound S. Surface expression of these mutation combinations was higher than that  
184 of WT, but comparable with each other (**Fig. 3c, Extended Data Fig. 3c**). As expected, none of  
185 these S mutation combinations fused with hACE2-expressing cells (**Fig. 3f, Extended Data Fig.**  
186 **4e,f**). We further tested the expression of soluble S ectodomain with different mutants.  
187 Interestingly, addition of the D994Q to 2P improved expression of soluble S ectodomain by  
188 approximately three-fold while the Q1005R drastically reduced expression of soluble S (**Extended**  
189 **Data Fig. 5**). Q1005R seemed to increase the formation of higher order oligomers of soluble S  
190 ectodomain, as observed by a peak higher than the expected size of trimeric S ectodomain in  
191 size exclusion chromatography of all mutants that contained Q1005R (**Extended Data Fig. 5b**).  
192 These observations indicate that certain mutations can improve the expression level of S in  
193 membrane-bound form but not soluble ectodomain form.

194  
195 *Structural and biophysical characterization of 2PQ spike*

196 Due to the improvement of 2PQ over 2P in soluble S ectodomain expression, we proceeded with  
197 biophysical characterization of 2PQ to rationalize the prefusion-stabilization mechanism of  
198 D994Q. The prefusion conformation of 2PQ was confirmed by low-resolution cryogenic electron  
199 microscopy (**Fig. 4a,b, Extended Data Fig. 6a**). We also assessed the thermal stability of 2PQ  
200 relative to 2P. Differential scanning fluorimetry revealed that both 2P and 2PQ had an apparent  
201 melting temperature at approximately 46.5 °C, similar to the previously reported value for 2P<sup>24</sup>.

202 Nevertheless, 2PQ had another peak at approximately 62 °C, suggesting that the additional  
203 D994Q mutation prevents immediate, complete unfolding of S (**Fig. 4c**). This observation is  
204 corroborated by *in silico* mutagenesis using Rosetta, which showed that helices are brought  
205 together in proximity so that D994Q forms an intraprotomer hydrogen bond with Q758 to stabilize  
206 the prefusion conformation (**Fig. 4d, Extended Data Fig. 6b**).

207  
208 Finally, we tested whether D994Q altered the antigenicity of the S protein. We compared the  
209 binding of 2P and 2PQ to various S antibodies, including CC12.3 (RBD)<sup>43</sup>, S2M28 (NTD)<sup>47</sup>,  
210 CC40.8 (S2 stem helix)<sup>44</sup>, and COVA1-07 (S2 HR1)<sup>48</sup>, using biolayer interferometry (BLI) or flow  
211 cytometry. 2P and 2PQ showed similar binding affinity to CC12.3, CC40.8 and S2M28 (**Fig. 4e**,  
212 **Extended Data Fig. 7a,b, Extended Data Fig. 8**). However, when assayed for binding with  
213 COVA1-07, a non-neutralizing antibody to the HR1<sup>48</sup>, 2PQ had an approximately 10-fold weaker  
214 dissociation constant, a slower on-rate and a faster off-rate than 2P (**Fig. 4e, Extended Data Fig.**  
215 **7c**). Since COVA1-07 only binds efficiently when S is in an open conformation that has  
216 transitioned away from the prefusion conformation<sup>48</sup>, our result substantiates that D994Q can  
217 further enhance the prefusion-stability of 2P, which is known to insufficiently stabilize the prefusion  
218 conformation<sup>24,25,49</sup>. Collectively, these data reveal a prefusion-stabilization mechanism of D994Q  
219 and demonstrate its minimal impact on S antigenicity.

## 220 221 **DISCUSSION**

222 Structure-based design<sup>50</sup> of prefusion-stabilized class I viral fusion proteins has been successfully  
223 applied to HIV<sup>51-54</sup>, RSV<sup>55</sup>, Nipah<sup>56</sup>, Lassa<sup>57</sup>, Ebola<sup>58</sup>, and more recently SARS-CoV-2<sup>24-27</sup>.  
224 Although structure-based design is an effective approach for prefusion-stabilization, it requires  
225 structural determination and subsequent expression, purification, and characterization of each  
226 candidate mutation individually. This laborious experimental process limits the  
227 comprehensiveness of using a structure-based approach to identify prefusion-stabilizing

228 mutations. In this study, we established a high-throughput approach to measure the fusogenicity  
229 of thousands of mutations in parallel. This approach enables systematic identification of prefusion-  
230 stabilizing mutations without relying on structural information. While we only provide a proof-of-  
231 concept using the SARS-CoV-2 S protein, our approach can be adopted to fusion proteins of  
232 other viruses. Given that prefusion-stabilization is critical for viral immunogen design<sup>50,59</sup>, our work  
233 here should advance the process of viral vaccine development.

234  
235 One interesting finding in this study is that improving the expression of membrane-bound (i.e. full-  
236 length) S protein does not necessarily improve the expression of soluble S ectodomain, as  
237 exemplified by Q1005R. This observation indicates that the ectodomain of the S protein has some  
238 long-range interactions with its native transmembrane domain, which is excluded from the S  
239 ectodomain construct. As a result, caution is needed when extrapolating the results obtained from  
240 full-length S protein to soluble S ectodomain, or vice versa. However, since most COVID-19  
241 vaccines on the market are based on the full-length membrane-bound S protein<sup>60</sup>, the results from  
242 our high-throughput fusion and expression assays, which are also based on full-length  
243 membrane-bound S protein, are directly applicable to COVID-19 vaccine development.

244  
245 Although most SARS-CoV-2 neutralizing antibodies target RBD<sup>61</sup>, recent studies have shown that  
246 antibodies to S2 can also neutralize, albeit often at a lower potency<sup>44,62-65</sup>. As a result,  
247 understanding the evolutionary constraints of S2 is relevant to SARS-CoV-2 antigenic drift and to  
248 design of more universal coronavirus vaccines. While many mutations in HR1 and CH, including  
249 those of major SARS-CoV-2 variants (**Extended Data Table 1**), do not negatively impact the  
250 expression or fusogenicity of the S protein (**Fig. 2b**), HR1 and CH show high degrees of  
251 evolutionary conservation among betacoronaviruses (**Extended Data Fig. 9**). This observation  
252 could be due to low levels of positive selection pressure on HR1 and CH, since most neutralizing  
253 antibodies are directed towards the RBD<sup>61</sup>. Alternatively, besides S protein expression and

254 fusogenicity, other evolutionary constraints on HR1 and CH may be present *in vivo*. Future studies  
255 of the relationship among S protein expression, fusogenicity, and virus replication fitness will  
256 provide important biophysical insights into the evolution of SARS-CoV-2.

257

258 If the prefusion-stabilizing mutations of betacoronavirus S protein were not reported in late  
259 2010s<sup>17,66</sup>, it would not have been possible to develop an effective COVID-19 vaccine at the speed  
260 that occurred, even with the availability and utilization of the mRNA vaccine technology. It is  
261 unclear whether the next pandemic will be caused by a virus that we have prior knowledge about.  
262 Consequently, while the speed of vaccine manufacturing has been revolutionized by the mRNA  
263 vaccine technology<sup>67</sup>, it is equally important to maximize the speed of immunogen design so that  
264 we are fully prepared for the next pandemic. We believe our work here provides an important step  
265 in that regard.

266 **METHODS**

267 *Cell culture*

268 Human embryonic kidney 293T (HEK293T) landing pad cells were grown and maintained in  
269 complete growth medium: Dulbecco's modified Eagle medium (DMEM) with high glucose (Gibco),  
270 supplemented with 10% v/v fetal bovine serum (FBS; VWR), 1× non-essential amino acids  
271 (Gibco), 100 U/mL penicillin and 100 µg/mL streptomycin (Gibco), 1× GlutaMAX (Gibco) and 2  
272 µg/mL doxycycline (Thermo Scientific) at 37 °C, 5% CO<sub>2</sub> and 95% humidity. Expi293F cells  
273 (Gibco) were grown and maintained in Expi293 expression medium (Gibco) at 37 °C, 8% CO<sub>2</sub>,  
274 95% humidity and 125 rpm according to the manufacturer's instructions.

275

276 *Landing pad plasmids*

277 attB plasmids each encoding (hACE2, an internal ribosomal entry site [IRES], and hygromycin  
278 resistance: attB-hACE2), (hACE2, an IRES, general control nondepressible 4 [GCN4] leucine  
279 zipper fused to mNG2<sub>1-10</sub>, a (GSG) P2A self-cleaving peptide, and hygromycin resistance: attB-  
280 hACE2-mNG2-1-10), and (S with the PRRA motif in the furin cleavage site deleted, an IRES,  
281 GCN4 leucine zipper fused to mNG2<sub>11</sub>, a (GSG) P2A self-cleaving peptide, and puromycin  
282 resistance: attB-S-mNG2-11) were constructed and assembled via polymerase chain reaction  
283 (PCR). The sequence of S used in this study was the ancestral (Wuhan-Hu-1) strain (GenBank  
284 accession ID: MN908947.3)<sup>68</sup>. The PRRA motif in the furin cleavage site was deleted to prevent  
285 spontaneous fusion of S-expressing cells with each other<sup>69</sup>. For experimental validation, mutants  
286 of S were individually constructed using PCR-based site-directed mutagenesis. Pairs of primers  
287 used for PCR-based site directed mutagenesis are listed in **Supplementary Table 2**.

288

289 *Deep mutational scanning library construction*

290 Cassette primers for DMS library construction are listed in **Supplementary Table 3**. Cassette  
291 primers were resuspended in MilliQ H<sub>2</sub>O such that the final concentration of all primers is 10 μM.  
292 Forward cassette primers, named as CassetteX\_N (X = 1, 2, ..., 19; N = 1, 2, ..., 8), that belong  
293 to the same cassette (i.e., the same value of X) were mixed in equimolar ratios. Each forward  
294 cassette primer also carried unique silent mutations (i.e. synonymous mutations) to help  
295 distinguish between sequencing errors and true mutations in downstream sequencing data  
296 analysis as described previously<sup>70</sup>. For the first round of PCR, two sets of reactions were set up.  
297 The first set had the mixed cassette primers and 5'-ACG ACG TCT CCT TCT CTA GGA AAG  
298 TGG GCT TTG C-3' as forward and reverse primers, respectively. The second set had 5'-TGC  
299 TCG TCT CCA AAG TGA CAC TGG CCG ACG CCG G-3' and CassetteX\_Rprimers (X = 1, 2,  
300 ..., 19) as forward and reverse primers, respectively. Since we had 19 cassettes, there were 19  
301 PCRs for each of the two sets of reactions. For both sets, the template used was attB-S-mNG2-  
302 11. Thereafter, products corresponding to the correct size were excised and purified using  
303 Monarch DNA Gel Extraction kit (NEB). For the second round of PCR, 10 ng of PCR product from  
304 each of the first and second sets in the same cassette were mixed. 5'-ACG ACG TCT CCT TCT  
305 CTA GGA AAG TGG GCT TTG C-3' and 5'-TGC TCG TCT CCA AAG TGA CAC TGG CCG ACG  
306 CCG G-3' were used as the forward and reverse primers, respectively. PCR products  
307 corresponding to the correct size were excised and purified using DNA Gel Extraction kit (NEB).  
308 100 ng of each gel-purified PCR products (total of 19) were mixed and digested with BsmBI  
309 restriction enzyme (NEB) for 2 h at 55 °C. Then, the product was purified using PureLink PCR  
310 Purification kit (Invitrogen) and served as the insert.

311  
312 To amplify the vector, attB-S-mNG2-11, 5'-CAC TCG TCT CGA GAA GGC GTG TTC GTG TCC  
313 AAC G-3', and 5'-GGC CCG TCT CAC TTT GTT GAA CAG CAG GTC CTC G-3' were used as  
314 template, forward primer, and reverse primer, respectively. The PCR product was digested with  
315 DpnI (NEB) for 2 h at 37 °C, purified with PureLink PCR Purification kit (Invitrogen), digested with

316 BsmBI restriction enzyme (NEB) for 2 h at 55 °C, and purified again using a PureLink PCR  
317 Purification kit (Invitrogen). All PCRs were performed using PrimeSTAR Max DNA Polymerase  
318 (Takara) according to the manufacturer's instructions.

319

320 BsmBI-digested vector and insert were ligated in a molar ratio of 1:100 to a total of 1 µg using T4  
321 DNA ligase (NEB) for 2 h at room temperature. A control ligation reaction was set up by only  
322 having the BsmBI-digested vector (no insert). 1 µL ligation reaction products were transformed  
323 into chemically competent DH5α *Escherichia coli* cells and plated onto agar plates with 100 µg/mL  
324 ampicillin. The ligation mixture that contained vector and insert had at least 10 times more  
325 colonies than the control reaction. Subsequently, the ligation mixture was column-purified using  
326 a PureLink PCR Purification kit and eluted in 10 µL of MilliQ H<sub>2</sub>O. 1 µL of the purified ligated  
327 product was mixed with 30 µL MegaX DH10β T1<sup>R</sup> electrocompetent *E. coli* cells (NEB) into an  
328 electroporation cuvette with a 1 mm gap (BTX). Electroporation was performed at 2.0 kV, 200 Ω  
329 and 25 µF using an ECM 830 square wave electroporation system (BTX). 1 mL of SOC recovery  
330 medium (NEB) was added immediately into cells after electroporation. Two electroporation  
331 reactions were performed. Cells were recovered for 1 h at 37 °C with shaking at 250 rpm. After  
332 recovery, cells were collected via centrifugation, resuspended in 400 µL lysogeny broth (LB),  
333 plated onto 150 mm agar plates supplemented with 100 µg/mL ampicillin, and incubated overnight  
334 at 37 °C. At least  $1 \times 10^6$  colonies were scrape-harvested with LB broth and plasmids were  
335 extracted using a PureLink Plasmid Midiprep kit (Invitrogen).

336

### 337 *Landing pad cell transfection*

338  $6.0 \times 10^5$  HEK293T landing pad cells in 1.35 mL of complete growth medium were seeded per  
339 well of a 6-well plate. 1.7 µg of attB-hACE2-mNG2-1-10 plasmid or attB-S-mNG2-11 plasmid were  
340 added into 5 µL FuGENE 6 transfection reagent (Promega) and OptiMEM (Gibco) to a total

341 volume of 240  $\mu\text{L}$ . The transfection mixture was subsequently added dropwise into cells.  
342 Transfection was carried out on the same day as seeding. One day post-transfection, 500  $\mu\text{L}$  of  
343 complete growth medium was added to cells. Three days post-transfection, medium was  
344 discarded, cells were washed with  $1\times$  PBS, and incubated in negative selection medium  
345 (complete growth medium supplemented with 10 nM AP1903) for one day at 37 °C, 5%  $\text{CO}_2$  and  
346 95% humidity. Then, the medium was discarded, cells were washed with  $1\times$  PBS, and recovered  
347 in complete growth medium for two days at 37 °C, 5%  $\text{CO}_2$  and 95% humidity. Cells were then  
348 trypsinized and grown in positive selection medium indefinitely: hACE2- and S-expressing cells  
349 were maintained in hygromycin medium (complete growth medium supplemented with 100  $\mu\text{g}/\text{mL}$   
350 hygromycin B [Invivogen]) and puromycin medium (complete growth medium supplemented with  
351 1  $\mu\text{g}/\text{mL}$  puromycin [Invivogen]), respectively.

352

353 To construct the S2 HR1/CH DMS cell line, the above protocol was used with modifications: 3.5  
354  $\times 10^6$  cells in 8 mL of complete growth medium in a T75 flask were transfected with 7.1  $\mu\text{g}$  of the  
355 DMS plasmid library and 29  $\mu\text{L}$  of FuGENE6 transfection reagent in 1.4 mL of OptiMEM. For  
356 positive selection and regular maintenance, puromycin medium was used.

357

### 358 *Flow cytometry*

359 To validate hACE2 surface expression after transfection, landing pad cells were harvested via  
360 centrifugation at  $300\times g$  for 5 min at 4 °C, resuspended in ice-cold FACS buffer (2% v/v FBS, 50  
361 mM EDTA in DMEM supplemented with high glucose, L-glutamine and HEPES, without phenol  
362 red [Gibco]), and incubated with 2  $\mu\text{g}/\text{mL}$  of SARS-CoV-2 S RBD-IgG Fc for 1 h at 4 °C. Then,  
363 cells were washed once, and resuspended with ice-cold FACS buffer. Cells were incubated with  
364 1  $\mu\text{g}/\text{mL}$  of phycoerythrin (PE)-conjugated anti-human IgG Fc (BioLegend). Cells were washed



365 once and resuspended in ice-cold FACS buffer. Cells were analyzed using an Accuri C6 flow  
366 cytometer (BD Biosciences).

367

368 The above protocol for verification and quantification of S surface expression was used except  
369 cells were incubated with 5 µg/mL of CC12.3<sup>43</sup>, an RBD antibody, instead of SARS-CoV-2 S RBD-  
370 IgG Fc, for 1 h at 4 °C. To quantify fold change in surface expression of S relative to WT based  
371 on median fluorescence intensity (MFI), equation (1) was used in the plot of FSC-A against PE:

$$372 \quad \text{MFI}_{\text{FC}} = \frac{\text{MFI}_{\text{mutant}} - \text{MFI}_{\text{control}}}{\text{MFI}_{\text{WT}} - \text{MFI}_{\text{control}}} \quad (1)$$

373 MFI values were obtained after plotting data in FCS Express Flow Cytometry software (De Novo  
374 Software). Gating strategy is shown in **Supplementary Fig. 3a**. Raw MFI and MFI<sub>FC</sub> values are  
375 provided as source data.

376

377 To assess fusogenicity of S (WT or mutants), an equal number of hACE2, mNG2<sub>1-10</sub>- and S,  
378 mNG2<sub>11</sub>-expressing cells were mixed such that the total cell number is  $5.0 \times 10^5$  cells per mL of  
379 complete growth medium. Cells were co-cultured for 3 h at 37 °C, 5% CO<sub>2</sub> and 95% humidity.  
380 Cells were then harvested and resuspended in ice-cold FACS buffer. Cells were analyzed using  
381 an Accuri C6 flow cytometer (BD Biosciences). Gating strategy is shown in **Supplementary Fig.**  
382 **3b**. The percentage of mNG2-positive events of mutants relative to that of WT S was calculated.  
383 Percentage of mNG2-positive events and fold change relative to WT are provided as source data.

384

### 385 *Expression sorting*

386 Cells expressing the S2 HR1/CH DMS library of S were harvested via centrifugation at  $300 \times g$   
387 for 5 min at 4 °C. Supernatant was discarded, and cells were resuspended in ice-cold FACS  
388 buffer. Cells were incubated with 5 µg/mL of CC12.3 for 1 h at 4 °C. Then, cells were washed  
389 once, and resuspended with ice-cold FACS buffer. Cells were incubated with 2 µg/mL of PE anti-

390 human IgG Fc. Cells were washed once, resuspended in ice-cold FACS buffer, and filtered  
391 through a 40 µm strainer. Cells were sorted via a four-way sort using a BigFoot spectral cell sorter  
392 (Invitrogen) according to PE fluorescence at 4 °C. Cells expressing the highest PE fluorescence  
393 were sorted into “bin 3”, then the next highest into “bin 2”, followed by “bin 1” and then “bin 0”.  
394 Each bin had ~25% of the singlet population. Gating strategy is shown in **Supplementary Fig.**  
395 **3c**. Number of cells collected per bin per replicate is shown in **Supplementary Table 4**. Of note,  
396 since CC12.3 binds to the RBD<sup>43</sup>, an independently folded region of S that is present only in the  
397 prefusion but not postfusion conformation<sup>1,71</sup>, our sort was based on the expression of prefusion  
398 S.

399

#### 400 *Fusion sorting*

401 Cells expressing the HR1/CH DMS library of S, and cells expressing hACE2 were resuspended  
402 in complete growth medium and filtered through a 40 µm cell strainer to obtain single cell  
403 suspensions.  $2.5 \times 10^6$  cells of each were mixed in a T-75 flask and complete growth medium  
404 added to a total volume of 10 mL. Six co-cultures were set up, with one of the co-cultures acting  
405 as a negative, non-fluorescent control by mixing hACE2- and S-expressing cells that do not have  
406 split mNG2. Co-cultures were incubated for 3 h at 37 °C, 5% CO<sub>2</sub> and 95% humidity.  
407 Subsequently, cells were harvested and pelleted via centrifugation at  $300 \times g$  for 5 min at 4 °C.  
408 Supernatant was discarded, and cells were resuspended in ice-cold FACS buffer. Cells were  
409 sorted via a two-way sort using a BigFoot spectral cell sorter (Invitrogen) according to presence  
410 or absence of mNG2 fluorescence at 4 °C. Gating strategy is shown in **Supplementary Fig. 3d**.  
411 Number of cells collected per bin per replicate is shown in **Supplementary Table 5**.

412

#### 413 *Post-sorting genomic DNA extraction*

414 After FACS, cell pellets were obtained via centrifugation at  $300 \times g$  for 15 min at 4 °C, and the  
415 supernatant was discarded. Genomic DNA was extracted using a DNeasy Blood and Tissue Kit  
416 (Qiagen) following the manufacturer's instructions with a modification: resuspended cells were  
417 incubated and lysed at 56 °C for 30 min instead of 10 min.

418

#### 419 *Deep sequencing*

420 After genomic DNA extraction, the region of interest was amplified via PCR using 5'-CAC TCT  
421 TTC CCT ACA CGA CGC TCT TCC GAT CTA CAT CTG CCC TGC TGG CCG GCA CA-3' and  
422 5'-GAC TGG AGT TCA GAC GTG TGC TCT TCC GAT CTG CAA AAG TCC ACT CTC TTG CTC  
423 TG-3' as forward and reverse primers, respectively. A maximum of 500 ng of genomic DNA per  
424 50 µL PCR reaction was used as template; 4 µg of genomic DNA per expression or fusion bin,  
425 per replicate, was used as template. PCR was performed using KOD DNA polymerase (Takara)  
426 with the following settings: 95 °C for 2 min, 25 cycles of (95 °C for 20 s, 56 °C for 15 s, 68 °C for  
427 20 s), 68 °C for 2 min, 12 °C indefinitely. All eight 50 µL reactions per bin per replicate were mixed  
428 after PCR. 100 µL of product per bin per replicate was used for purification using a PureLink PCR  
429 Purification kit. Subsequently, 10 ng of the purified PCR product per bin per replicate was  
430 appended with Illumina deep sequencing barcodes via PCR using KOD DNA polymerase with  
431 the following settings: 95 °C for 2 min, 9 cycles of (95 °C for 25 s, 56 °C for 15 s, 68 °C for 20 s),  
432 68 °C for 2 min, 12 °C indefinitely. Barcoded products were mixed and sequenced with a MiSeq  
433 PE300 v3 flow cell (Illumina).

434

#### 435 *Analysis of deep sequencing data*

436 Forward and reverse reads were merged via PEAR<sup>72</sup>. Using custom Python code, forward reads  
437 were translated and matched to the corresponding mutant. Counts for expression and fusion bins  
438 for each replicate were tabulated. For each replicate, the frequency of each mutant was calculated

439 as the count of that mutant divided by the total number of counts in that bin, as shown in equation  
 440 (2):

$$441 \quad F_{\text{mut, bin}X} = \frac{C_{\text{mut, bin}X}}{\sum C_{\text{bin}X}} \text{ for } X = 0, 1, 2, 3, \text{mNG2}^-, \text{mNG2}^+ \quad (2)$$

442 For each replicate, the weighted expression score for each mutant ( $W_{\text{mut}}$ ) was calculated using  
 443 equation (3):

$$444 \quad W_{\text{mut}} = \frac{(F_{\text{mut, bin}0} \times 0.25) + (F_{\text{mut, bin}1} \times 0.5) + (F_{\text{mut, bin}2} \times 0.75) + (F_{\text{mut, bin}3} \times 1)}{F_{\text{mut, bin}0} + F_{\text{mut, bin}1} + F_{\text{mut, bin}2} + F_{\text{mut, bin}3}} \quad (3)$$

445 The weighted expression scores were normalized ( $W_{\text{mut}}^{\text{norm}}$ ) such that the average  $W_{\text{mut}}$  of  
 446 nonsense mutations equals 0, and the average  $W_{\text{mut}}$  of silent mutations equals 1 using equation  
 447 (4):

$$448 \quad W_{\text{mut}}^{\text{norm}} = \frac{W_{\text{mut}} - W_{\text{nonsense}}^{\text{avg}}}{W_{\text{silent}}^{\text{avg}} - W_{\text{nonsense}}^{\text{avg}}} \quad (4)$$

449 The final expression score ( $W_{\text{mut}}^{\text{avg}}$ ) for each mutant was calculated using equation (5):

$$450 \quad W_{\text{mut}}^{\text{avg}} = \frac{1}{3} \times (W_{\text{mut}}^{\text{norm, rep1}} + W_{\text{mut}}^{\text{norm, rep2}} + W_{\text{mut}}^{\text{norm, rep3}}) \quad (5)$$

451 Fusion scores ( $U_{\text{mut}}$ ) were calculated for each replicate by the formula shown in equation (6):

$$452 \quad U_{\text{mut}} = \log_{10} \left( \frac{F_{\text{mut, mNG2}^+}}{F_{\text{mut, mNG2}^-}} \right) \quad (6)$$

453 Fusion scores were normalized ( $U_{\text{mut}}^{\text{norm}}$ ) such that the  $U_{\text{mut}}^{\text{avg}}$  of silent mutations equals 1, and the  
 454  $U_{\text{mut}}^{\text{avg}}$  of nonsense mutations equals 0 using equation (7):

$$455 \quad U_{\text{mut}}^{\text{norm}} = \frac{U_{\text{mut}} - U_{\text{nonsense}}^{\text{avg}}}{U_{\text{WT}}^{\text{avg}} - U_{\text{nonsense}}^{\text{avg}}} \quad (7)$$

456

457 Then, the final average score ( $U_{\text{mut}}^{\text{avg}}$ ) for each mutant was calculated using equation (8):

$$458 \quad U_{\text{mut}}^{\text{avg}} = \frac{1}{2} \times (U_{\text{mut}}^{\text{norm, rep1}} + U_{\text{mut}}^{\text{norm, rep2}}) \quad (8)$$

459 Adjusted fusion score of each mutant is equal to the residual of that mutant in a linear regression  
460 model of fusion score against expression score. The linear regression model and residuals were  
461 calculated using the 'lm' and 'resid' functions in RStudio, respectively.

462

#### 463 *Sequence conservation analysis*

464 Sequences were obtained from GenBank or GISAID (**Extended Data Table 1, Supplementary**  
465 **Table 7**). A BLAST database was created, and the reference sequence of the DMS region  
466 (residues 883-1034) was used to run tblastn to generate BlastXML files. The reference sequence  
467 used was the founder strain of SARS-CoV-2 (GenBank accession number: MN908947.3)<sup>68</sup>.  
468 Extracted information was obtained by running 'XML\_Extraction.py'<sup>73</sup>. Multiple alignment using  
469 MAFFT was then performed<sup>74</sup>. Sequence conservation was calculated based on the residue  
470 conservation at each position relative to the reference sequence. Mean expression score and  
471 mean fusion score were calculated by taking the average of the expression scores and fusion  
472 scores of all mutants, respectively, at that position.

473

#### 474 *Fluorescence microscopy*

475 Images were captured with an ECHO Revolve epifluorescence microscope (ECHO) with a  
476 UPLANFL N 10×/0.30 NA objective (Olympus) using the FITC channel for mNG2 fluorescence.  
477 Brightfield images were also obtained using white light. Fluorescent and brightfield images were  
478 then overlaid. Identical exposure and intensity settings were used to capture images. Scale bars  
479 correspond to 100 μm for all micrographs.

480

#### 481 *Cryogenic electron microscopy*

482 To prepare cryoEM grid, an aliquot of 3.5 μL purified protein at ~1 mg/mL concentration was  
483 applied to a 300-mesh Quantifoil R1.2/1.3 Cu grid pre-treated with glow-discharge, blotted in a  
484 Vitrobot Mark IV machine (force -5, time 3 s), and plunge-frozen in liquid ethane. The grid was

485 loaded in a Titan Krios microscope equipped with Gatan BioQuantum K3 imaging filter and  
486 camera. A 10-eV slit was used for the filter. Data collection was done with serialEM<sup>75</sup>. Images  
487 were recorded at 130,000× magnification, corresponding to a pixel size of 0.33 Å/pix at super-  
488 resolution mode of the camera. A defocus range of -0.8 µm to -1.5 µm was set. A total dose of  
489 50 e<sup>-</sup>/Å<sup>2</sup> of each exposure was fractionated into 50 frames. The first two frames of the movie  
490 stacks were not included in motion-correction. CryoEM data processing was performed on the fly  
491 with cryoSPARC Live<sup>76</sup> following regular single-particle procedures.

492

#### 493 *Rosetta-based mutagenesis*

494 The structure of S was obtained from the Protein Data Bank (PDB ID: 6ZGE). N-acetyl-D-  
495 glucosamine and water molecules were removed using PyMOL (Schrödinger), and amino acids  
496 were renumbered using pdb-tools<sup>77</sup>. The 'fixbb' application in Rosetta (RosettaCommons) was  
497 used to generate the D994Q mutation in all protomers. One-hundred poses were obtained, and  
498 the lowest scoring pose was used for further processing. A constraint file was generated using  
499 the lowest-scoring pose from fixed backbone mutagenesis as input, and the 'minimize\_with\_cst'  
500 application in Rosetta. Fast relax was subsequently performed using the 'relax' application<sup>78</sup> with  
501 the constraint file. The lowest scoring pose out of thirty was used for structural analysis.

502

#### 503 *Antibody expression and purification*

504 Codon-optimized oligonucleotides encoding the heavy chain and light chain of the indicated  
505 antibodies were cloned into phCMV3 plasmids in an IgG1 Fc format with a mouse immunoglobulin  
506 kappa signal peptide. Plasmids encoding the heavy chain and light chain of antibodies were  
507 transfected into Expi293F cells using an Expifectamine 293 transfection kit (Gibco) in a 2:1 mass  
508 ratio following the manufacturer's protocol. Supernatant was harvested 6 days post-transfection  
509 and centrifuged at 4000 × g for 30 min at 4 °C to remove cells and debris. The supernatant was

510 subsequently clarified using a polyethersulfone membrane filter with a 0.22  $\mu\text{m}$  pore size  
511 (Millipore).

512

513 CaptureSelect CH1-XL beads (Thermo Scientific) were washed with MilliQ  $\text{H}_2\text{O}$  thrice and  
514 resuspended in 1 $\times$  PBS. The clarified supernatant was incubated with washed beads overnight  
515 at 4  $^\circ\text{C}$  with gentle rocking. Then, flowthrough was collected, and beads washed once with 1 $\times$   
516 PBS. Beads were incubated in 60 mM sodium acetate, pH 3.7 for 10 min at 4  $^\circ\text{C}$ . The eluate  
517 containing antibody was buffer-exchanged into 1 $\times$  PBS using a centrifugal filter unit with a 30 kDa  
518 molecular weight cut-off (Millipore) four times. Antibodies were stored at 4  $^\circ\text{C}$ .

519

#### 520 *Soluble S protein expression and purification*

521 SARS-CoV-2 S ectodomain (residues 1-1213, which includes the native signal peptide) with the  
522 PRRA motif in the furin cleavage site deleted, C-terminal SGGGG linker, biotinylation site,  
523 thrombin cleavage site, Foldon trimerization sequence, and 6 $\times$ His-tag were all cloned in-frame  
524 into a pHCMV3 vector via PCR. Site-directed mutagenesis via PCR was performed to generate  
525 the indicated mutants of soluble S protein.

526

527 Expi293F cells were transfected with vectors encoding the indicated soluble spike protein mutant  
528 using an Expifectamine 293 transfection kit following the manufacturer's protocol. Cells were  
529 harvested six days post-transfection. The supernatant was collected via centrifugation at 4000  $\times$   
530  $g$  for 30 min at 4  $^\circ\text{C}$ , and further clarified using a polyethersulfone membrane with a 0.22  $\mu\text{m}$  pore  
531 size (Millipore). The clarified supernatant was incubated with washed Ni sepharose excel His-  
532 tagged protein purification resin (Cytiva) with gentle rocking overnight at 4  $^\circ\text{C}$ . Flow-through was  
533 collected. Beads were washed once with 20 mM imidazole in 1 $\times$  PBS, then washed once with 40  
534 mM imidazole in 1 $\times$  PBS, and finally eluted with 300 mM imidazole in 1 $\times$  PBS thrice. Wash and

535 elution fractions were subjected to denaturing sodium dodecyl sulfate-polyacrylamide gel  
536 electrophoresis (**Extended Data Fig. 5a**). All elution fractions were combined and concentrated  
537 using a centrifugal filter unit with a 30 kDa molecular weight cut-off (Millipore) via centrifugation  
538 at  $4000 \times g$  and  $4^\circ\text{C}$  for 15 min. The concentrated protein mixture was passed through a Superdex  
539 200 XK 16/100 column in 20 mM Tris-HCl pH 8.0 and 150 mM NaCl for size-exclusion  
540 chromatography (**Extended Data Fig. 5b-c**). Fractions corresponding to ~540 kDa were pooled  
541 and concentrated using a centrifugal filter unit with a 30 kDa molecular weight cut-off (Millipore)  
542 via centrifugation at  $4000 \times g$  and  $4^\circ\text{C}$  for 15 min.

543

#### 544 *Differential scanning fluorimetry*

545 200 ng/ $\mu\text{L}$  of purified S protein and  $5\times$  SYPRO orange (Thermo Fisher Scientific) were added into  
546 20 mM Tris-HCl pH 8.0, 150 mM NaCl in optically clear tubes. SYPRO orange fluorescence  
547 intensity in relative fluorescence units (RFU) was measured over temperatures ranging from 10  
548  $^\circ\text{C}$  to  $95^\circ\text{C}$  using a CFX Connect Real-Time PCR Detection System (Bio-Rad). Melting  
549 temperature ( $T_m$ ) was calculated as the temperature at which the first derivative of fluorescence  
550 intensity with respect to temperature,  $-\frac{d(\text{RFU})}{dT}$ , was minimum.

551

#### 552 *Biolayer interferometry*

553 Anti-His-tag (HIS1K) biosensors (Sartorius) were incubated in BLI buffer (0.002% v/v Tween-20  
554 in  $1\times$  PBS) at room temperature for 30 min. Then, BLI was performed on an Octet 96e system  
555 (Sartorius) at room temperature with shaking at 1000 rpm as follows: baseline in BLI buffer for 60  
556 s, loading with 500 nM  $6\times$ His-tagged soluble 2P or 2PQ for 15 min, baseline in BLI buffer for 60  
557 s, association with the indicated antibody and concentration for 2 min, dissociation in BLI buffer  
558 for 5 min. Data were collected with Octet Data Acquisition software (Sartorius) and analyzed with



559 Octet Data Analysis software (Sartorius). A 1:1 model was used for curve fitting and estimating  
560 the dissociation constants, on-rates and off-rates.

561 **DATA AVAILABILITY**

562 Structures from the following identifiers from the Protein Data Bank (PDB) were used in this study:  
563 6VXX and 6VYB. The cryoEM map of 2PQ spike will be deposited to Electron Microscopy Data  
564 Bank (EMDB) prior to publication. Raw sequencing data have been submitted to the NIH Short  
565 Read Archive under accession number: PRJNA826665. Biological materials including plasmids,  
566 and the S2 HR1/CH DMS and hACE2 stable cell lines can be obtained by contacting N.C.W.  
567 Source data are available for this paper.

568

569 **CODE AVAILABILITY**

570 Custom codes to analyze deep mutational scanning, thermal stability, flow cytometry and BLI data  
571 have been deposited to [https://github.com/nicwulab/SARS2\\_S\\_fusogenicity\\_DMS](https://github.com/nicwulab/SARS2_S_fusogenicity_DMS).

572

573 **ACKNOWLEDGEMENTS**

574 We thank the Roy J. Carver Biotechnology Center at the University of Illinois at Urbana-  
575 Champaign for assistance with fluorescence-activated cell sorting and deep sequencing. We  
576 thank the cryogenic-electron microscopy core facility at the Case Western Reserve University  
577 School of Medicine. This work was supported by National Institutes of Health (NIH) R01 AI167910  
578 (N.C.W.), DP2 AT011966 (N.C.W.), R35 GM142886 (K.A.M.), the Michelson Prizes for Human  
579 Immunology and Vaccine Research (N.C.W.), the Searle Scholars Program (N.C.W.), and the Bill  
580 and Melinda Gates Foundation INV-004923 (I.A.W.).

581

582 **AUTHOR CONTRIBUTIONS**

583 T.J.C.T and N.C.W. conceived and designed the study. T.J.C.T. established the fusion assay and  
584 performed the deep mutational scanning experiments. T.J.C.T and N.C.W. analyzed the deep  
585 mutational scanning data. T.J.C.T., R.L. and W.O.O. expressed and purified recombinant  
586 proteins. Z.M. and X.D. performed cryo-EM analysis. K.A.M. provided the landing pad cells and

587 helped establish the fusion assay. M.Y. and I.A.W. provided the CC12.3 antibody; G.S. and R.A.  
588 provided the CC40.8 antibody. T.J.C.T. and C.K. performed the microscopy analysis. T.J.C.T.  
589 and N.C.W. wrote the paper and all authors reviewed and/or edited the paper.

590

591 **COMPETING INTERESTS**

592 N.C.W., K.A.M. and T.J.C.T. have filed a provisional patent application with the University of  
593 Illinois covering the method described in this article. N.C.W. serves as a consultant for HeliXon.  
594 The authors declare no other competing interests.

595 **FIGURES**

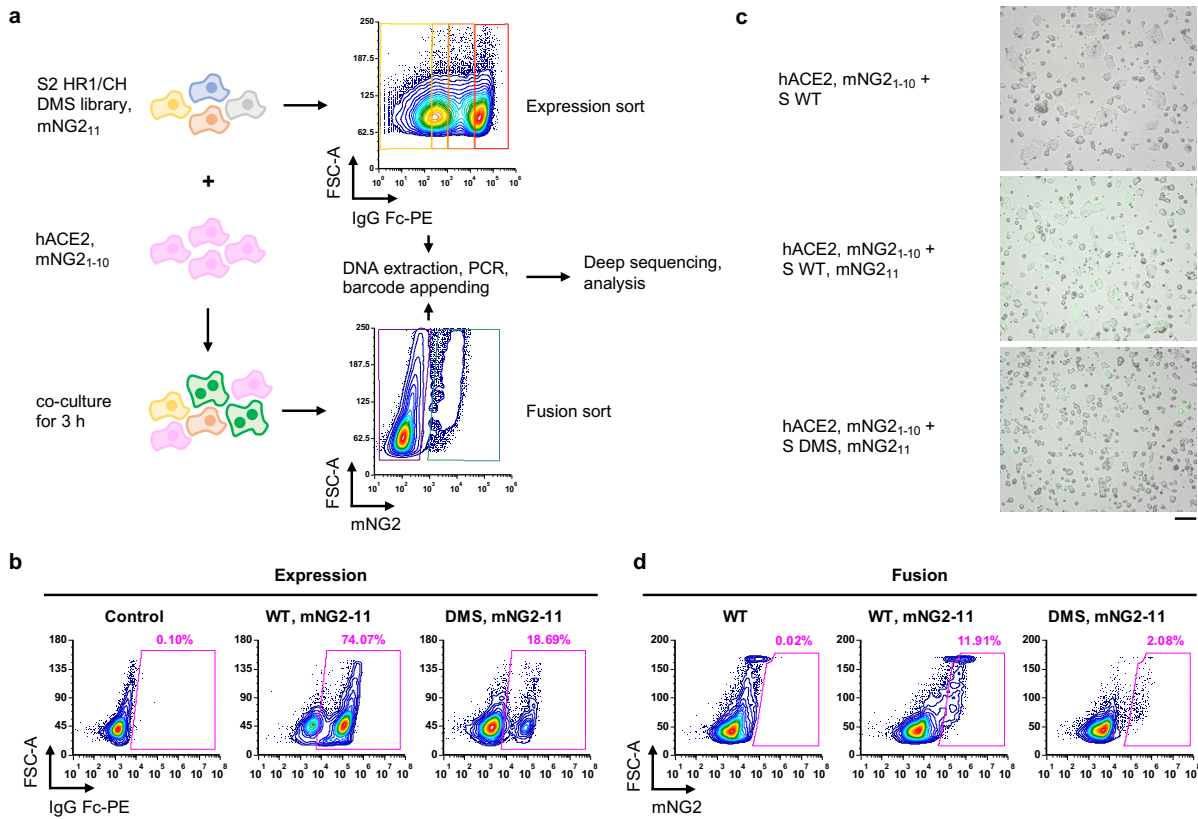

596

597 **Fig. 1 | Measuring protein expression and fusogenicity of SARS-CoV-2 S mutations using**

598 **deep mutational scanning. a**, Schematic of high-throughput expression and fusion assays for S

599 mutants. **b**, Flow cytometry analysis of S protein expression in HEK293T landing pad cells that

600 encoded WT S or the DMS library. **c**, Fluorescent micrographs of co-culturing S-expression cells

601 with hACE2-expressing cells. Scale bar: 100  $\mu$ m. **d**, Flow cytometry analysis of fusion activity of

602 co-culturing hACE2-expressing cells with HEK293T landing pad cells that encoded WT S or the

603 DMS library. Components of split mNG2 are indicated where present.

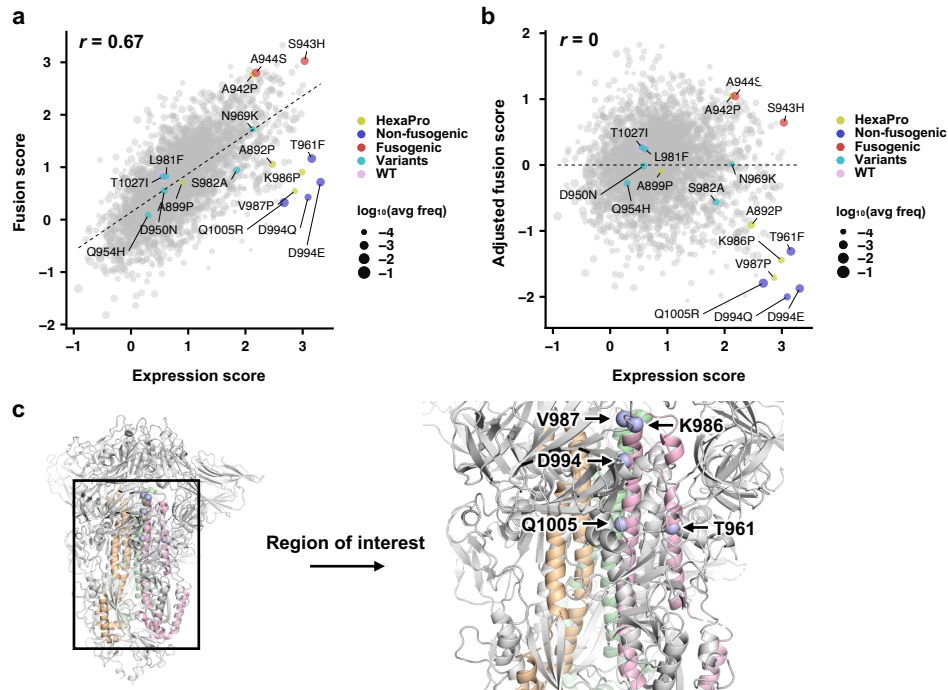

604

605 **Fig. 2 | Expression and fusion scores of individual mutations in the DMS library. a,** Plot of

606 fusion score against expression score for each mutant is shown. WT is indicated in pink. Mutations

607 used in HexaPro<sup>24</sup> are in yellow. Representative fusion-incompetent mutations identified in this

608 study are in purple (non-fusogenic). Representative mutations that enhance S fusogenicity are in

609 red (fusogenic). Mutations found in major SARS-CoV-2 variants (**Extended Data Table 1**) are in

610 teal (variants). Each data point represents one mutation in the DMS library. Individual data points

611 are sized according to average frequency of the corresponding mutations. **b,** Plot of adjusted

612 fusion score against expression score for each mutant is shown. Pearson correlation coefficient,

613  $r$ , is shown in **a,b**. **c,** Locations of fusion-incompetent mutations are indicated by light blue

614 spheres. Regions that are mutated in the DMS library are colored wheat, green and pink for each

615 monomer. Other regions on the S are colored in grey. Source data are available as

616 **Supplementary Table 1.**

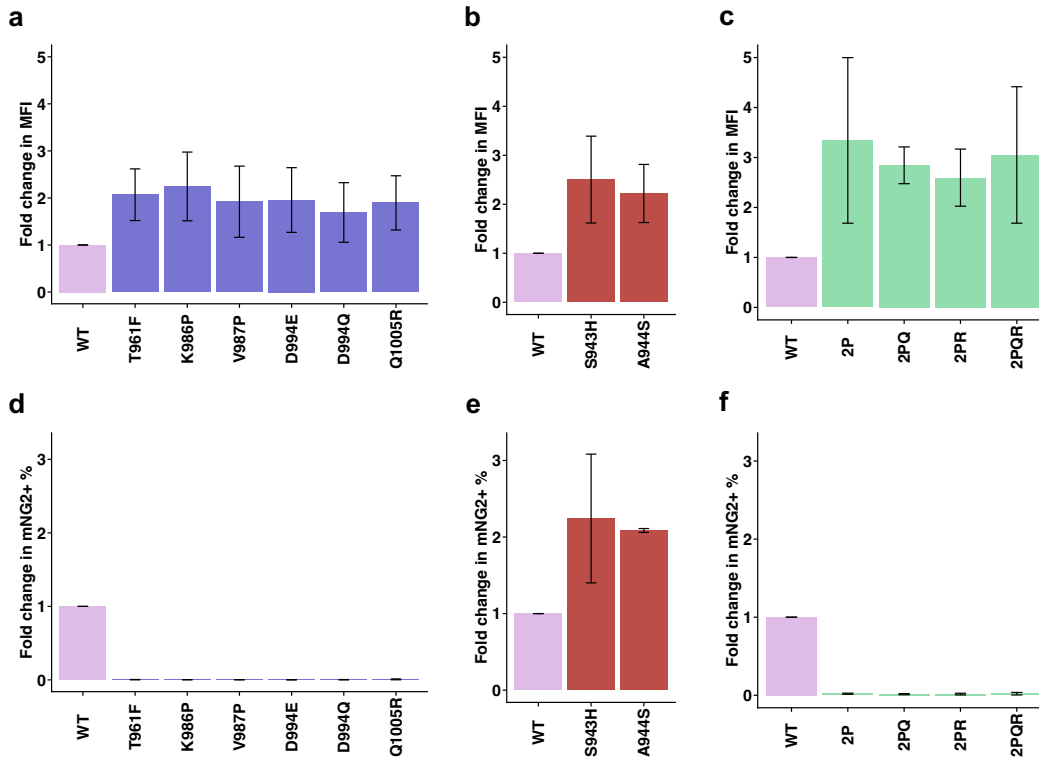

617

618 **Fig. 3 | Validation of candidate prefusion-stabilizing mutations.** a-c, Expression of prefusion-

619 stabilizing mutations (a), fusion-enhancing mutations (b), and combinations of candidate

620 prefusion-stabilizing mutations of S (c) relative to WT. Of note, the numerical values of fold change

621 in median fluorescence intensity (MFI) indicate relative and not absolute fold changes in surface

622 expression levels of S. d-f, Fold change in fusion activity of candidate prefusion-stabilizing

623 mutations (d), fusion-enhancing mutations (e), and combinations of candidate prefusion-

624 stabilizing mutations of S (f) relative to WT at 3 hours post-mixing with hACE2-expressing cells.

625 Abbreviations for combinatorial mutations are as follows: 2P, K986P/V987P; 2PQ,

626 K986P/V987P/D994Q; 2PR, K986P/V987P/Q1005R; 2PQR, K986P/V987P/D994Q/Q1005R.

627 Fold changes are shown as mean  $\pm$  range. Data are from  $n = 2$  independent replicates. Source

628 data are available.

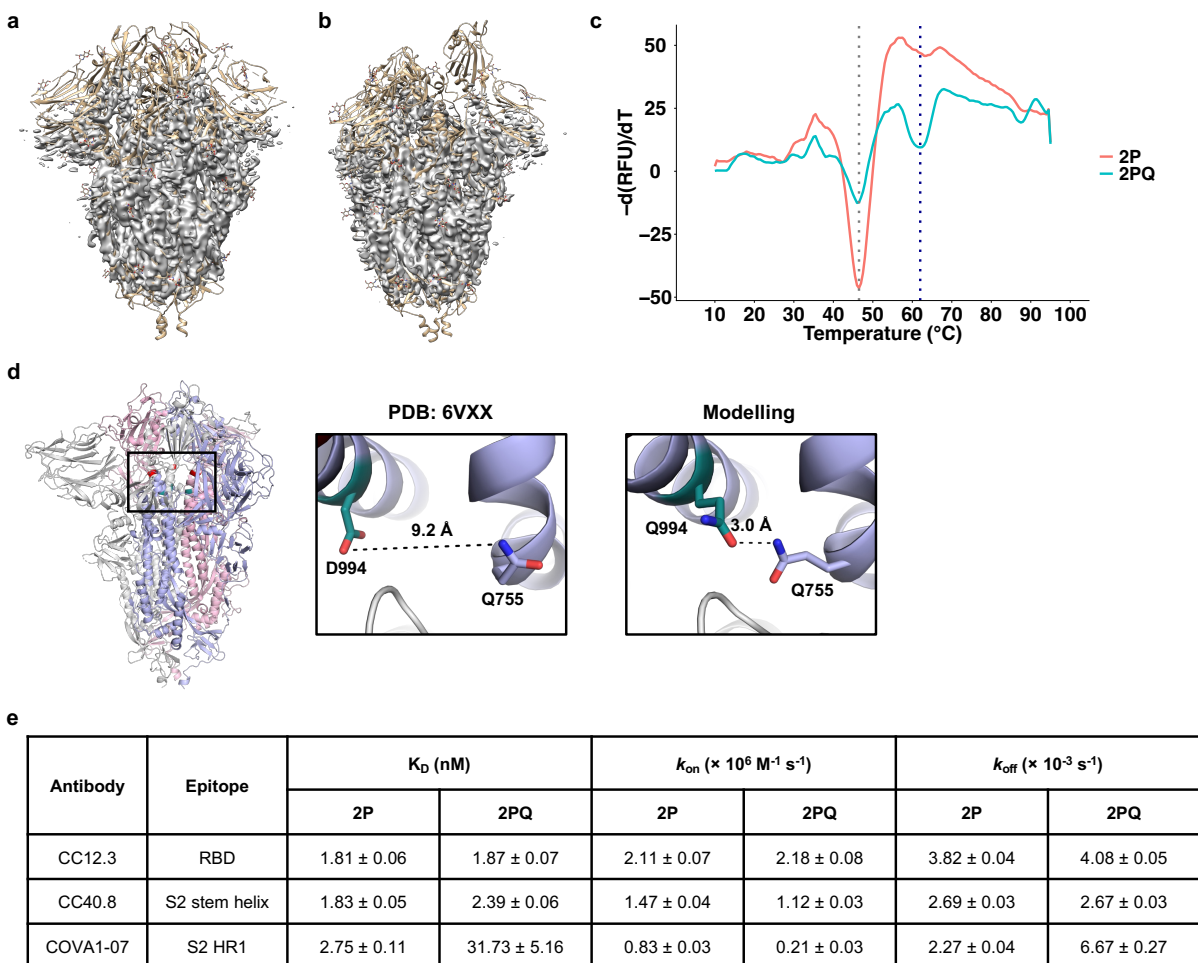

629

630 **Fig. 4 | Biophysical characterization of 2PQ spike. a,b**, Electron density map (colored grey) of

631 2PQ fitted on S with all-down RBD (PDB: 6VXX) (a), and one-up RBD (PDB: 6VYB) (b). c, The

632 first differential curves for the relative fluorescence unit (RFU) from differential scanning

633 fluorimetry with respect to temperature are shown for soluble 2PQ and 2P. Grey dotted line

634 indicates the first apparent melting temperature ( $T_m$ ) of 2P and 2PQ at approximately 46.5 °C;

635 blue dotted line indicates the second apparent  $T_m$  of 2PQ at approximately 62 °C. d, D994Q allows

636 formation of an additional intraprotomer hydrogen bond as shown by structural modelling. Distinct

637 protomers are in grey, light blue and pink. The Q758 and Q994 side chains are shown as sticks

638 representation. Hydrogen bond is indicated in black dashed line with the distance indicated. e,

639 Summary of binding kinetics data from biolayer interferometry (BLI) experiments. Dissociation

640 constants ( $K_D$ ), on-rates ( $k_{on}$ ) and off-rates ( $k_{off}$ ) are shown as mean  $\pm$  standard error. Source data  
641 are available.



642 EXTENDED DATA FIGURES

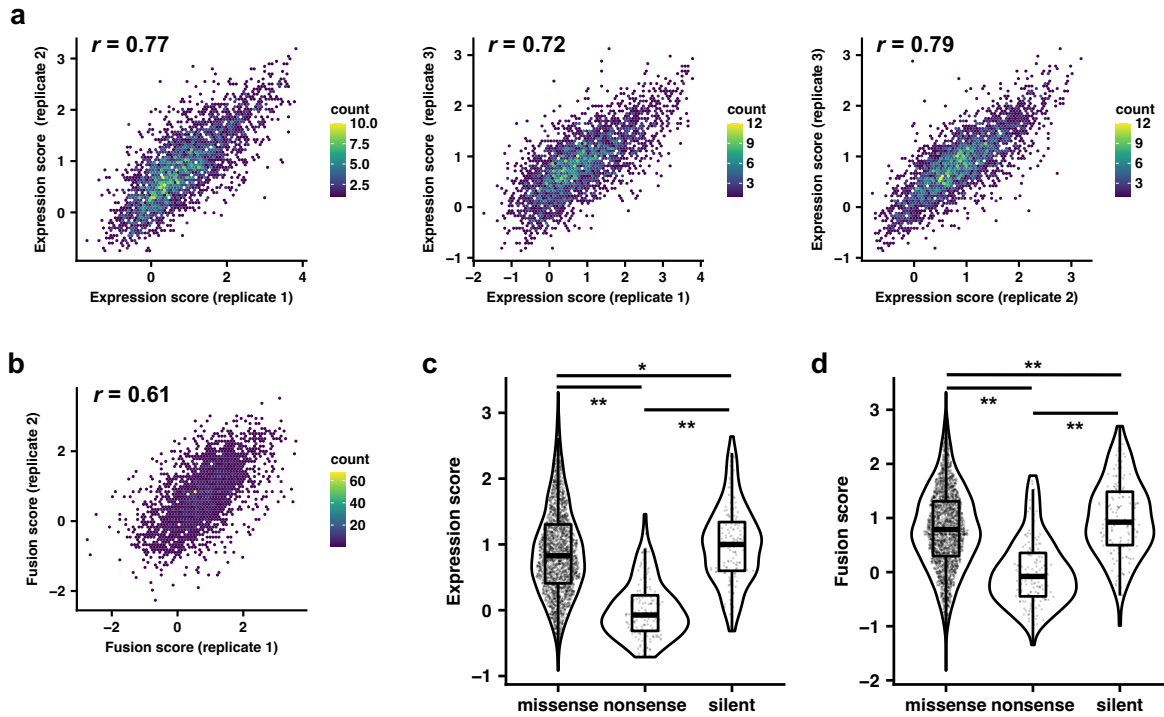

643

644 **Extended Data Fig. 1 | Additional analyses for expression and fusion assays. a,b,**

645 Correlation of expression scores **(a)** and fusion scores **(b)** between replicates. Pearson correlation

646 coefficient,  $r$ , is shown for each plot. **c,d**, Violin plots of expression scores **(c)** and fusion scores

647 **(d)** of missense, nonsense, and silent mutations are compared. Box and whisker plots are also

648 shown. \*,  $p < 0.05$ ; \*\*,  $p < 0.001$ . Exact  $p$ -values from two-sided  $t$  test are shown in

649 **Supplementary Table 6**. Source data are available as **Supplementary Table 1**.



654 were not observed. Expression and fusion scores shown are the mean of  $n = 3$  and  $n = 2$   
655 independent replicates, respectively. Lower expression score implies lower surface expression of  
656 the S protein, whereas lower fusion score suggests fusogenicity is impaired. Abbreviations of  
657 amino acid residues are as follows: A, alanine; C, cysteine; D, aspartic acid; E, glutamic acid; F,  
658 phenylalanine; G, glycine; H, histidine; I, isoleucine; K, lysine; L, leucine; M, methionine; N,  
659 asparagine; P, proline; Q, glutamine; R, arginine; S, serine; T, threonine; V, valine; W, tryptophan;  
660 Y, tyrosine. Source data are available as **Supplementary Table 1**.

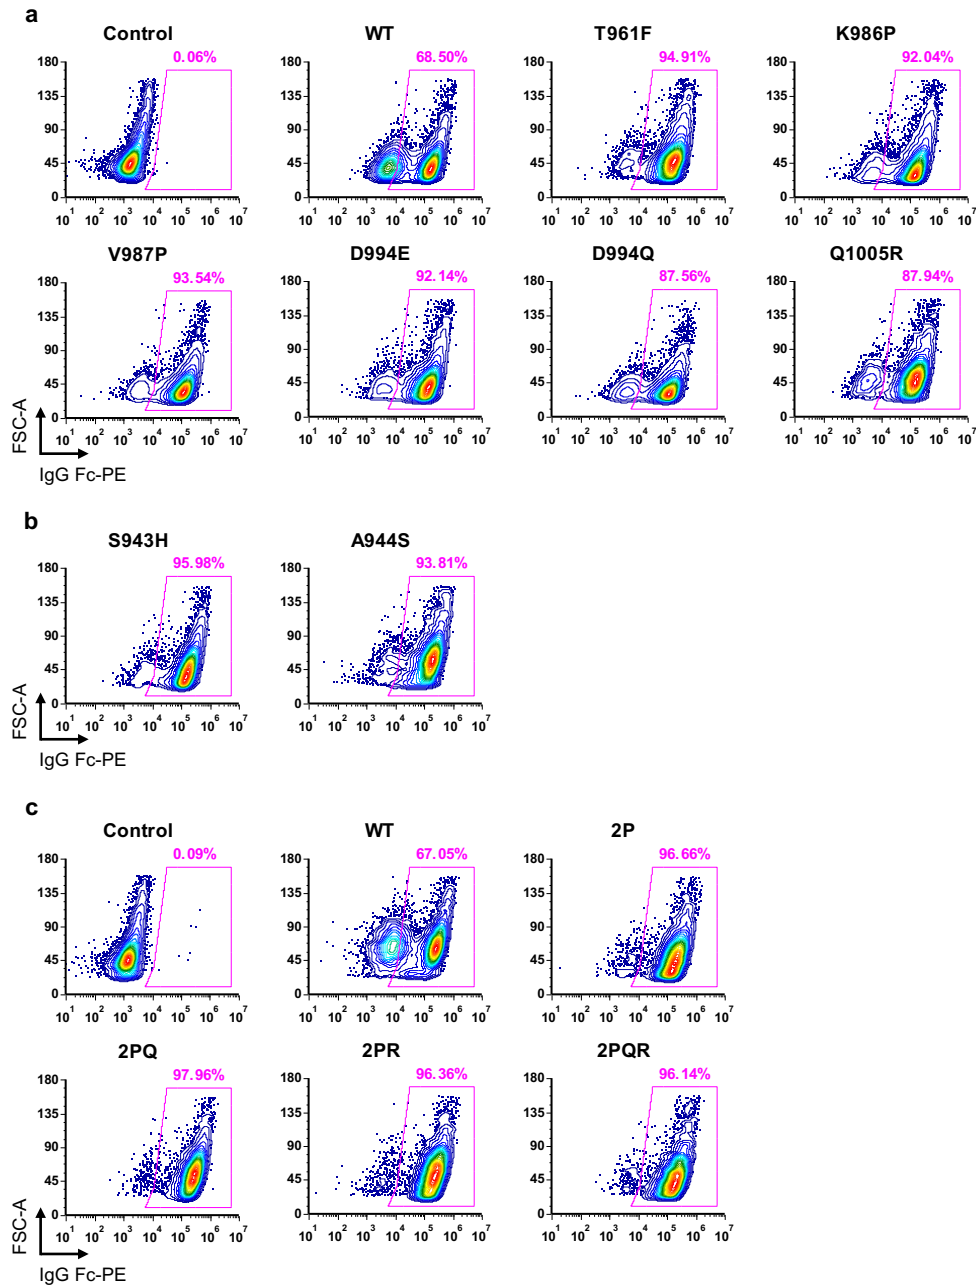

661

662 **Extended Data Fig. 3 | Validation of surface expression of mutants of interest. a-c,** Flow

663 cytometry plots showing surface expression of candidate prefusion-stabilizing mutations **(a),**

664 fusion-enhancing mutations **(b),** and combinations of candidate prefusion-stabilizing mutations

665 **(c).** Plots are representative of  $n = 2$  independent replicates. Abbreviations for combinatorial

666 mutations are as follows: 2P, K986P/V987P; 2PQ, K986P/V987P/D994Q; 2PR,

667 K986P/V987P/Q1005R; 2PQR, K986P/V987P/D994Q/Q1005R.

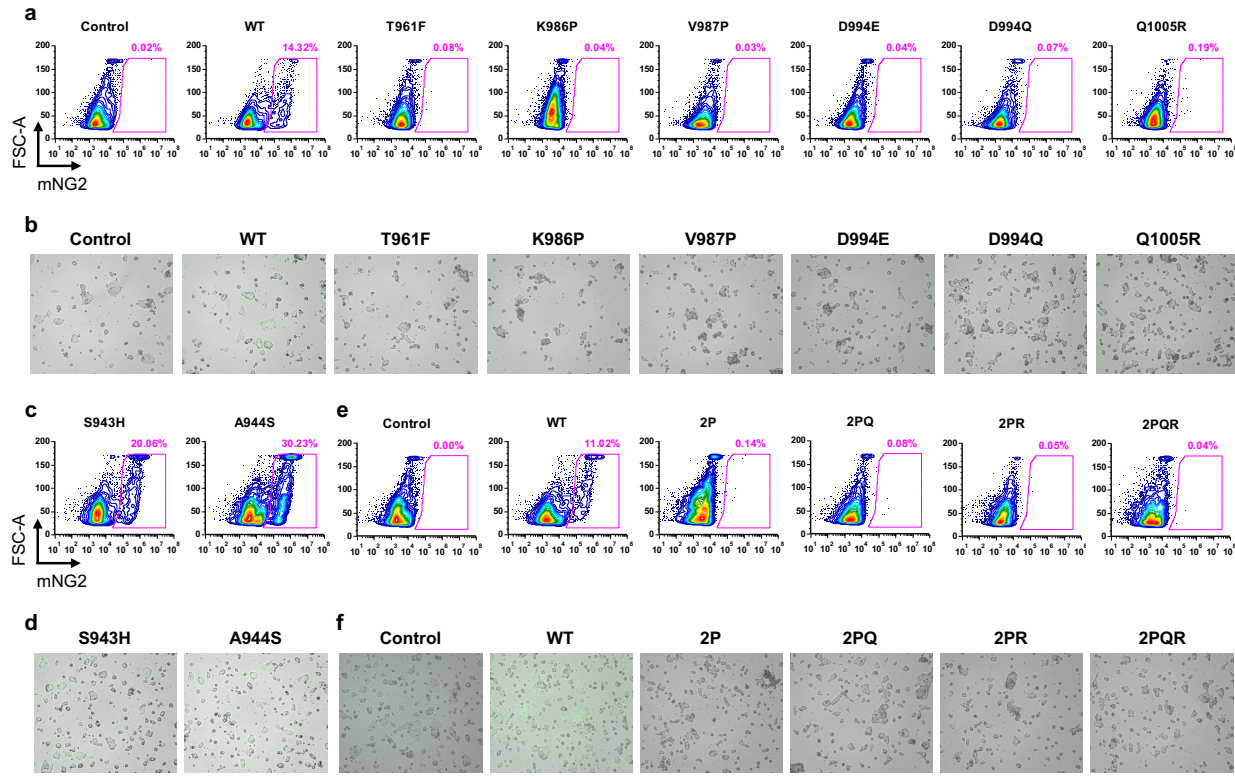

668

669 **Extended Data Fig. 4 | Fusion activity of mutants of interest. a,b,** Flow cytometry plots (a)

670 and micrographs (b) of S-expressing cells with fusion-incompetent mutations at 3 hours post-

671 mixing with hACE2-expressing cells. c,d, Flow cytometry plots (c) and micrographs (d) of S-

672 expression cells with fusion-enhancing mutations at 3 post-mixing with hACE2-expressing cells.

673 e,f, Flow cytometry plots (e) and micrographs (f) of S-expression cells with combinations of fusion-

674 incompetent mutations at 3 hours post-mixing with hACE2-expressing cells. Plots and

675 micrographs are representative of  $n = 2$  independent replicates. Abbreviations of combinatorial

676 mutations are as follows: 2P, K986P/V987P; 2PQ, K986P/V987P/D994Q; 2PR,

677 K986P/V987P/Q1005R; 2PQR, K986P/V987P/D994Q/Q1005R. Scale bar: 100  $\mu$ m.

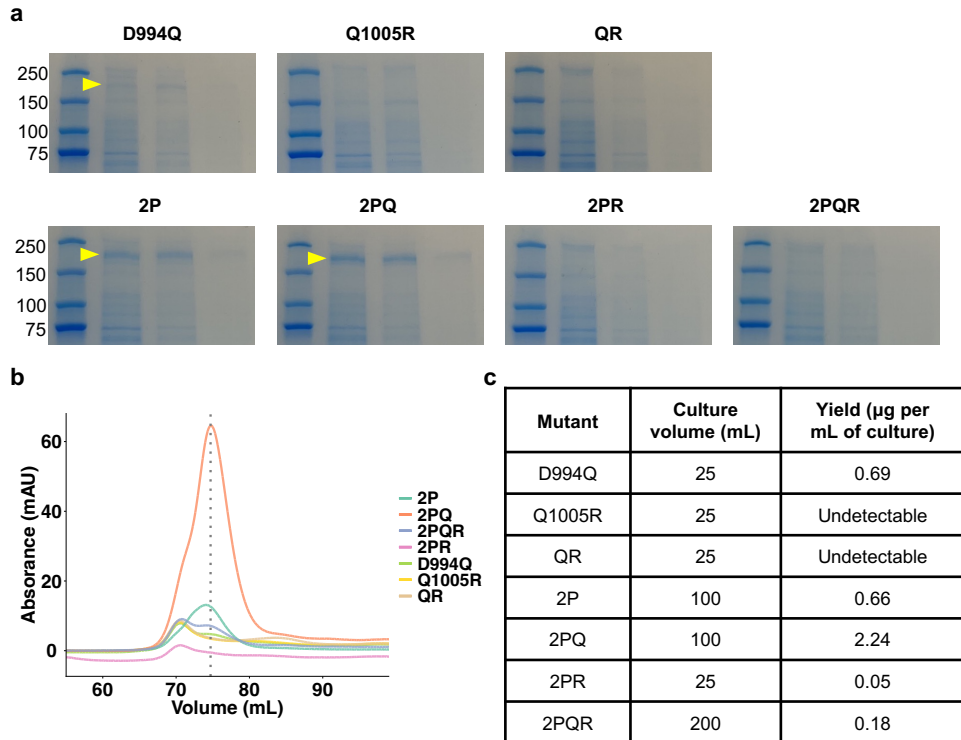

678

679 **Extended Data Fig. 5 | Purification of S ectodomain mutants.** **a**, SDS-PAGE gels of soluble

680 spike proteins after His-tag affinity purification. Molecular weights (in kDa) of protein standards

681 are shown. Arrowheads point to the band corresponding to the size of a glycosylated S monomer

682 (~180 kDa). **b**, Chromatograms of soluble spike ectodomain mutants for biophysical

683 characterization. Dotted line indicates the peak volume (~74 mL) corresponding to the size of a

684 glycosylated spike trimer (~540 kDa). Fractions from 73 mL to 79 mL were collected and

685 concentrated. **c**, Culture volume and yield for each mutant in **b**. Abbreviations for combinatorial

686 mutations are as follows: QR, D994Q/Q1005R; 2P, K986P/V987P; 2PQ, K986P/V987P/D994Q;

687 2PR, K986P/V987P/Q1005R; 2PQR, K986P/V987P/D994Q/Q1005R. Source data are available.

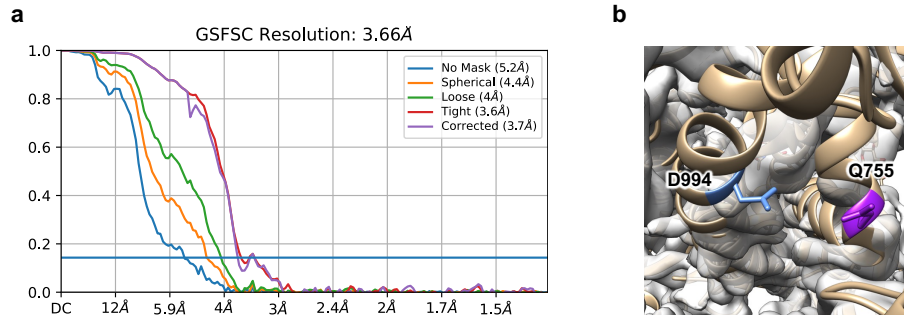

688

689 **Extended Data Fig. 6 | Cryo-EM structure validation and analysis.** **a**, Gold-standard Fourier  
690 shell correlation curve of soluble 2PQ ectodomain. **b**, Fit of cryo-EM density map of S with 2PQ  
691 mutations (in grey) to resolved structure of S with 2P mutations (PDB: 6VXX). Helices in 2PQ as  
692 indicated by the electron density map are closer compared to those in 2P. Contour level of density  
693 map was set to 0.2 in UCSF Chimera.

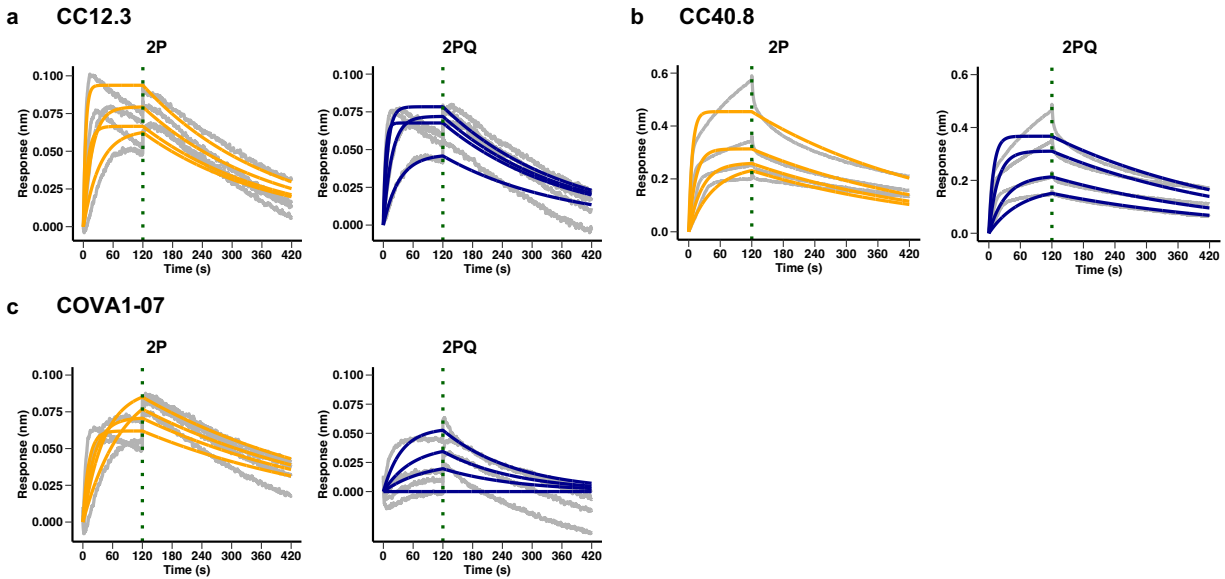

694

695 **Extended Data Fig. 7 | Binding kinetics of SARS-CoV-2 S antibodies to soluble 2P and 2PQ.**

696 **a-c**, Sensorgrams for biolayer interferometry experiments to quantify binding kinetics of soluble  
697 2P and 2PQ with CC12.3, an RBD antibody (**a**), CC40.8, an S2 stem helix antibody (**b**), and  
698 COVA1-07, an S2 HR1 antibody (**c**). Grey lines correspond to raw data. Orange (2P) and blue  
699 (2PQ) lines correspond to fitted curves. The green vertical dotted line marks the end of association  
700 step and the beginning of dissociation step. Source data are available.



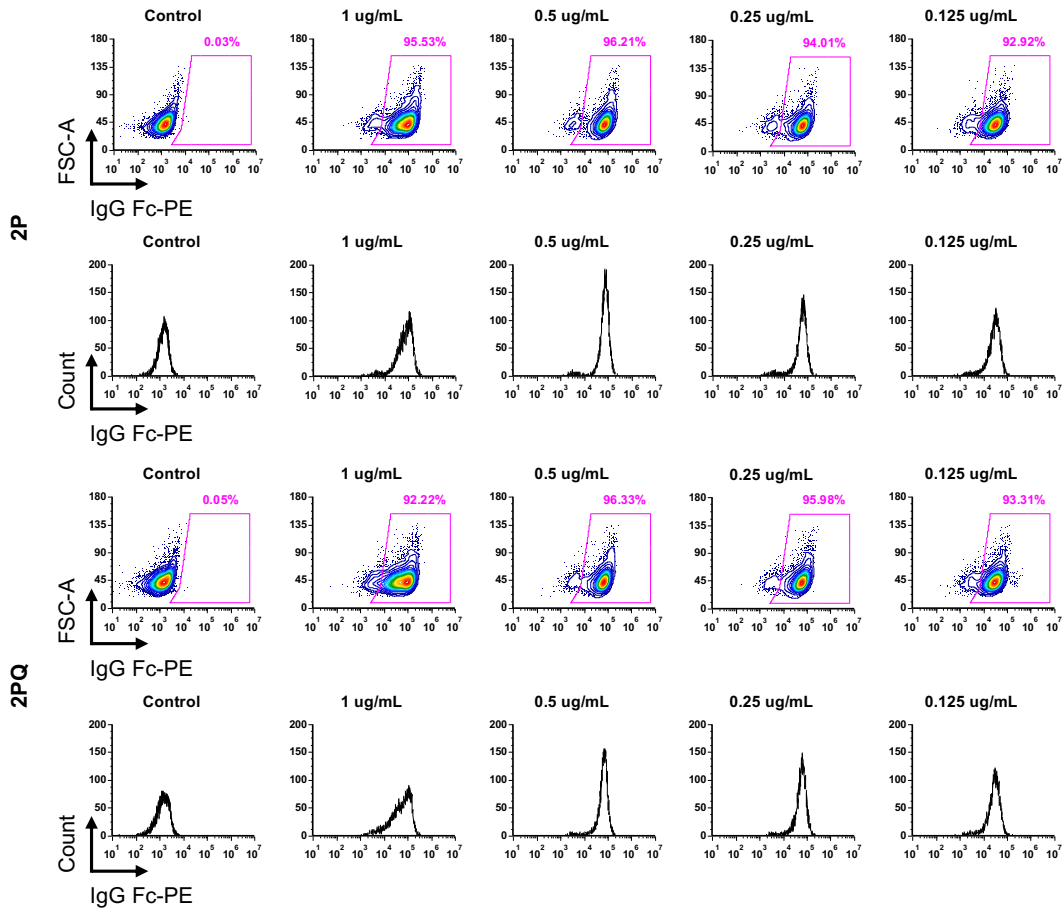

701

702 **Extended Data Fig. 8 | Binding of S2M28 to membrane-bound 2P and 2PQ.** Flow cytometry

703 plots and histograms showing binding of S2M28, an NTD antibody, to membrane-bound 2P or

704 2PQ. Varying concentrations of S2M28 are indicated above each plot. Plots are representative of

705  $n = 2$  independent replicates.

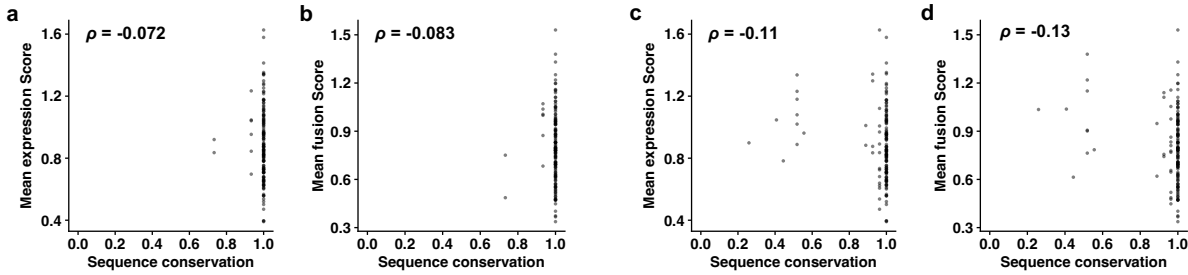

706

707 **Extended Data Fig. 9 | Sequence conservation analysis of S2 HR1 and CH mutations. a,b,**

708 Plots of mean expression score (a) and mean fusion score (b) against natural frequency in HR1

709 and CH of major SARS-CoV-2 variants (Extended Data Table 1). c,d, Plots of mean expression

710 score (c) and mean fusion score (d) against sequence conservation of the S2 HR1 and CH

711 regions of related betacoronaviruses listed in Supplementary Table 6. Spearman correlation

712 coefficients,  $\rho$ , are shown in a-d. Source data are available.

713 **EXTENDED DATA TABLES**

714 **Extended Data Table 1.** Mutations that are included in our DMS library (residues 883 to 1034)

715 and also found in SARS-CoV-2 variants of concern and variants of interest.

| <b>Variants of concern</b>               |                     |                                                             |
|------------------------------------------|---------------------|-------------------------------------------------------------|
| <b>PANGO Lineage</b>                     | <b>Mutations</b>    | <b>GenBank Reference</b>                                    |
| Alpha<br>(B.1.1.7)                       | S982A               | MZ344997.1                                                  |
| Beta<br>(B.1.351)                        | -                   | MW598419.1                                                  |
| Gamma<br>(P.1)                           | T1027I              | MZ169911.1                                                  |
| Delta<br>(B.1.617.2)                     | D950N               | MZ359841.1                                                  |
| Omicron<br>(B.1.1.529: BA.1)             | Q954H, N969K, L981F | OL672836.1                                                  |
| Omicron<br>(B.1.1.529: BA.2, BA.4, BA.5) | Q954H, N969K        | OM685375.1 (BA.2)<br>ON373214.1 (BA.4)<br>ON249995.1 (BA.5) |
| <b>Variants of interest</b>              |                     |                                                             |
| <b>PANGO Lineage</b>                     | <b>Mutations</b>    | <b>GenBank Reference</b>                                    |
| Epsilon<br>(B.1.427, B.1.429)            | -                   | MW453103.1                                                  |
| Zeta<br>(P.2)                            | -                   | MW523796.1                                                  |
| Eta<br>(B.1.525)                         | F888L               | MW560924.1                                                  |
| Iota<br>(B.1.526)                        | -                   | MW643362.1                                                  |
| Kappa<br>(B.1.617.1)                     | -                   | MW966601.1                                                  |
| Lambda<br>(C.37)                         | -                   | MW850639.1                                                  |
| Mu<br>(B.1.621)                          | D950N               | EPI_ISL_1220045<br>(GISAID)                                 |

716

717 **Extended Data Table 2.** Cryo-EM data collection statistics.

|                                                     | 2PQ spike<br>(EMDB-xxxx) |
|-----------------------------------------------------|--------------------------|
| <b>Data collection and processing</b>               |                          |
| Magnification                                       | 130,000                  |
| Voltage (kV)                                        | 300                      |
| Electron exposure (e <sup>-</sup> /Å <sup>2</sup> ) | 50                       |
| Defocus range (μm)                                  | -0.8 to -1.5             |
| Pixel size (Å)                                      | 0.66                     |
| Symmetry imposed                                    | C1                       |
| Initial particle images (no.)                       | 238,524                  |
| Final particle images (no.)                         | 140,183                  |
| Map resolution (Å)                                  | 3.66                     |
| FSC threshold                                       | 0.143                    |
| Map resolution range (Å)                            | N/A                      |

718

## 719 REFERENCES

- 720 1. Cai, Y. *et al.* Distinct conformational states of SARS-CoV-2 spike protein. *Science* **369**,  
721 1586-1592 (2020).
- 722 2. Zhou, P. *et al.* A pneumonia outbreak associated with a new coronavirus of probable bat  
723 origin. *Nature* **579**, 270-273 (2020).
- 724 3. Letko, M., Marzi, A. & Munster, V. Functional assessment of cell entry and receptor  
725 usage for SARS-CoV-2 and other lineage B betacoronaviruses. *Nat. Microbiol.* **5**, 562-  
726 569 (2020).
- 727 4. Lan, J. *et al.* Structure of the SARS-CoV-2 spike receptor-binding domain bound to the  
728 ACE2 receptor. *Nature* **581**, 215-220 (2020).
- 729 5. Chiliveri, S. C., Louis, J. M., Ghirlando, R. & Bax, A. Transient lipid-bound states of spike  
730 protein heptad repeats provide insights into SARS-CoV-2 membrane fusion. *Sci. Adv.* **7**,  
731 eabk2226 (2021).
- 732 6. Marcink, T. C. *et al.* Intermediates in SARS-CoV-2 spike-mediated cell entry. *Sci. Adv.*  
733 **8**, eabo3153 (2022).
- 734 7. Doderro-Rojas, E., Onuchic, J. N. & Whitford, P. C. Sterically confined rearrangements of  
735 SARS-CoV-2 Spike protein control cell invasion. *eLife* **10**, e70362 (2021).
- 736 8. Walls, A. C. *et al.* Tectonic conformational changes of a coronavirus spike glycoprotein  
737 promote membrane fusion. *Proc. Natl. Acad. Sci. USA* **114**, 11157-11162 (2017).
- 738 9. Gorgun, D., Lihan, M., Kapoor, K. & Tajkhorshid, E. Binding mode of SARS-CoV-2  
739 fusion peptide to human cellular membrane. *Biophys. J.* **120**, 2914-2926 (2021).
- 740 10. Koppiseti, R. K., Fulcher, Y. G. & Van Doren, S. R. Fusion peptide of SARS-CoV-2  
741 spike rearranges into a wedge inserted in bilayered micelles. *J. Am. Chem. Soc.* **143**,  
742 13205-13211 (2021).
- 743 11. Cerutti, G. *et al.* Potent SARS-CoV-2 neutralizing antibodies directed against spike N-  
744 terminal domain target a single supersite. *Cell Host Microbe* **29**, 819-833.e7 (2021).
- 745 12. Qing, E. *et al.* Inter-domain communication in SARS-CoV-2 spike proteins controls  
746 protease-triggered cell entry. *Cell Rep.* **39**, 110786 (2022).
- 747 13. Barnes, C. O. *et al.* SARS-CoV-2 neutralizing antibody structures inform therapeutic  
748 strategies. *Nature* **588**, 682-687 (2020).
- 749 14. Liu, L. *et al.* Potent neutralizing antibodies against multiple epitopes on SARS-CoV-2  
750 spike. *Nature* **584**, 450-456 (2020).
- 751 15. Yuan, M., Liu, H., Wu, N. C. & Wilson, I. A. Recognition of the SARS-CoV-2 receptor  
752 binding domain by neutralizing antibodies. *Biochem. Biophys. Res. Commun.* **538**, 192-  
753 203 (2021).

- 754 16. Bowen, J. E. *et al.* SARS-CoV-2 spike conformation determines plasma neutralizing  
755 activity. *bioRxiv*, doi:10.1101/2021.12.19.473391 (2021).
- 756 17. Pallesen, J. *et al.* Immunogenicity and structures of a rationally designed prefusion  
757 MERS-CoV spike antigen. *Proc. Natl. Acad. Sci. USA* **114**, E7348-E7357 (2017).
- 758 18. Yuan, Y. *et al.* Cryo-EM structures of MERS-CoV and SARS-CoV spike glycoproteins  
759 reveal the dynamic receptor binding domains. *Nat. Commun.* **8**, 15092 (2017).
- 760 19. Kirchdoerfer, R. N. *et al.* Pre-fusion structure of a human coronavirus spike protein.  
761 *Nature* **531**, 118-121 (2016).
- 762 20. Gilbert, P. B. *et al.* Immune correlates analysis of the mRNA-1273 COVID-19 vaccine  
763 efficacy clinical trial. *Science* **375**, 43-50 (2022).
- 764 21. Skowronski, D. M. & De Serres, G. Safety and efficacy of the BNT162b2 mRNA Covid-  
765 19 vaccine. *New Engl. J. Med.* **384**, 1576-1577 (2021).
- 766 22. Sadoff, J. *et al.* Safety and efficacy of single-dose Ad26.COV2.S vaccine against Covid-  
767 19. *New Engl. J. Med.* **384**, 2187-2201 (2021).
- 768 23. Heath, P. T. *et al.* Safety and efficacy of NVX-CoV2373 Covid-19 vaccine. *New Engl. J.*  
769 *Med.* **385**, 1172-1183 (2021).
- 770 24. Hsieh, C.-L. *et al.* Structure-based design of prefusion-stabilized SARS-CoV-2 spikes.  
771 *Science* **369**, 1501-1505 (2020).
- 772 25. Juraszek, J. *et al.* Stabilizing the closed SARS-CoV-2 spike trimer. *Nat. Commun.* **12**,  
773 244 (2021).
- 774 26. Riley, T. P. *et al.* Enhancing the prefusion conformational stability of SARS-CoV-2 spike  
775 protein through structure-guided design. *Front. Immunol.* **12**, 660198 (2021).
- 776 27. Olmedillas, E. *et al.* Structure-based design of a highly stable, covalently-linked SARS-  
777 CoV-2 spike trimer with improved structural properties and immunogenicity. *bioRxiv*,  
778 doi:10.1101/2021.05.06.441046 (2021).
- 779 28. Matreyek, K. A. *et al.* Multiplex assessment of protein variant abundance by massively  
780 parallel sequencing. *Nat. Genet.* **50**, 874-882 (2018).
- 781 29. Suiter, C. C. *et al.* Massively parallel variant characterization identifies NUDT15 alleles  
782 associated with thiopurine toxicity. *Proc. Natl. Acad. Sci. USA* **117**, 5394-5401 (2020).
- 783 30. Chiasson, M. A. *et al.* Multiplexed measurement of variant abundance and activity  
784 reveals VKOR topology, active site and human variant impact. *eLife* **9**, e58026 (2020).
- 785 31. Matreyek, K. A., Stephany, J. J., Chiasson, M. A., Hasle, N. & Fowler, D. M. An  
786 improved platform for functional assessment of large protein libraries in mammalian  
787 cells. *Nucleic Acids Res.* **48**, e1 (2020).
- 788 32. Matreyek, K. A., Stephany, J. J. & Fowler, D. M. A platform for functional assessment of  
789 large variant libraries in mammalian cells. *Nucleic Acids Res.* **45**, e102 (2017).

- 790 33. Ouyang, W. O. *et al.* Probing the biophysical constraints of SARS-CoV-2 spike N-  
791 terminal domain using deep mutational scanning. *bioRxiv*,  
792 doi:10.1101/2022.06.20.496903 (2022).
- 793 34. Kondo, N., Miyauchi, K., Meng, F., Iwamoto, A. & Matsuda, Z. Conformational changes  
794 of the HIV-1 envelope protein during membrane fusion are inhibited by the replacement  
795 of its membrane-spanning domain. *J. Biol. Chem.* **285**, 14681-14688 (2010).
- 796 35. Baviskar, P. S., Hotard, A. L., Moore, M. L. & Oomens, A. G. The respiratory syncytial  
797 virus fusion protein targets to the perimeter of inclusion bodies and facilitates filament  
798 formation by a cytoplasmic tail-dependent mechanism. *J. Virol.* **87**, 10730-10741 (2013).
- 799 36. Atanasiu, D. *et al.* Dual split protein-based fusion assay reveals that mutations to herpes  
800 simplex virus (HSV) glycoprotein gB alter the kinetics of cell-cell fusion induced by HSV  
801 entry glycoproteins. *J. Virol.* **87**, 11332-11345 (2013).
- 802 37. Meng, B. *et al.* SARS-CoV-2 Spike N-Terminal Domain modulates TMPRSS2-  
803 dependent viral entry and fusogenicity. *Cell Rep.* **40**, 111220 (2022).
- 804 38. Meng, B. *et al.* Altered TMPRSS2 usage by SARS-CoV-2 Omicron impacts infectivity  
805 and fusogenicity. *Nature* **603**, 706-714 (2022).
- 806 39. Bradel-Tretheway, B. G. *et al.* Nipah and Hendra virus glycoproteins induce comparable  
807 homologous but distinct heterologous fusion phenotypes. *J. Virol.* **93**, e00577-19 (2019).
- 808 40. Cabantous, S., Terwilliger, T. C. & Waldo, G. S. Protein tagging and detection with  
809 engineered self-assembling fragments of green fluorescent protein. *Nat. Biotechnol.* **23**,  
810 102-107 (2005).
- 811 41. Fowler, D. M. & Fields, S. Deep mutational scanning: a new style of protein science. *Nat.*  
812 *Methods* **11**, 801-807 (2014).
- 813 42. Feng, S. *et al.* Improved split fluorescent proteins for endogenous protein labeling. *Nat.*  
814 *Commun.* **8**, 370 (2017).
- 815 43. Yuan, M. *et al.* Structural basis of a shared antibody response to SARS-CoV-2. *Science*  
816 **369**, 1119-1123 (2020).
- 817 44. Zhou, P. *et al.* A human antibody reveals a conserved site on beta-coronavirus spike  
818 proteins and confers protection against SARS-CoV-2 infection. *Sci. Transl. Med.* **14**,  
819 eabi9215 (2022).
- 820 45. Krammer, F. SARS-CoV-2 vaccines in development. *Nature* **586**, 516-527 (2020).
- 821 46. Klasse, P. J., Nixon, D. F. & Moore, J. P. Immunogenicity of clinically relevant SARS-  
822 CoV-2 vaccines in nonhuman primates and humans. *Sci. Adv.* **7**, eabe8065 (2021).
- 823 47. McCallum, M. *et al.* N-terminal domain antigenic mapping reveals a site of vulnerability  
824 for SARS-CoV-2. *Cell* **184**, 2332-2347.e16 (2021).

- 825 48. Claireaux, M. *et al.* A public antibody class recognizes an S2 epitope exposed on open  
826 conformations of SARS-CoV-2 spike. *Nat. Commun.* **13**, 4539 (2022).
- 827 49. Henderson, R. *et al.* Controlling the SARS-CoV-2 spike glycoprotein conformation. *Nat.*  
828 *Struct. Mol. Biol.* **27**, 925-933 (2020).
- 829 50. Sanders, R. W. & Moore, J. P. Virus vaccines: proteins prefer prolines. *Cell Host*  
830 *Microbe* **29**, 327-333 (2021).
- 831 51. Binley, J. M. *et al.* A recombinant human immunodeficiency virus type 1 envelope  
832 glycoprotein complex stabilized by an intermolecular disulfide bond between the gp120  
833 and gp41 subunits is an antigenic mimic of the trimeric virion-associated structure. *J.*  
834 *Viol.* **74**, 627-643 (2000).
- 835 52. Sanders, R. W. *et al.* Stabilization of the soluble, cleaved, trimeric form of the envelope  
836 glycoprotein complex of human immunodeficiency virus type 1. *J. Virol.* **76**, 8875-8889  
837 (2002).
- 838 53. Kong, L. *et al.* Uncleaved prefusion-optimized gp140 trimers derived from analysis of  
839 HIV-1 envelope metastability. *Nat. Commun.* **7**, 12040 (2016).
- 840 54. Sanders, R. W. *et al.* A Next-Generation Cleaved, Soluble HIV-1 Env Trimer, BG505  
841 SOSIP.664 gp140, Expresses Multiple Epitopes for Broadly Neutralizing but Not Non-  
842 Neutralizing Antibodies. *PLoS Path.* **9**, e1003618 (2013).
- 843 55. McLellan, J. S. *et al.* Structure of RSV fusion glycoprotein trimer bound to a prefusion-  
844 specific neutralizing antibody. *Science* **340**, 1113-1117 (2013).
- 845 56. Loomis, R. J. *et al.* Structure-based design of Nipah virus vaccines: a generalizable  
846 approach to paramyxovirus immunogen development. *Front. Immunol.* **11**, 842 (2020).
- 847 57. Hastie, K. M. *et al.* Structural basis for antibody-mediated neutralization of Lassa virus.  
848 *Science* **356**, 923-928 (2017).
- 849 58. Rutten, L. *et al.* Structure-based design of prefusion-stabilized filovirus glycoprotein  
850 trimers. *Cell Rep.* **30**, 4540-4550.e3 (2020).
- 851 59. Caradonna, T. M. & Schmidt, A. G. Protein engineering strategies for rational  
852 immunogen design. *npj Vaccines* **6**, 154 (2021).
- 853 60. Heinz, F. X. & Stiasny, K. Distinguishing features of current COVID-19 vaccines: knowns  
854 and unknowns of antigen presentation and modes of action. *npj Vaccines* **6**, 104 (2021).
- 855 61. Premkumar, L. *et al.* The receptor-binding domain of the viral spike protein is an  
856 immunodominant and highly specific target of antibodies in SARS-CoV-2 patients. *Sci.*  
857 *Immunol.* **5**, eabc8413 (2020).
- 858 62. Wang, C. *et al.* A conserved immunogenic and vulnerable site on the coronavirus spike  
859 protein delineated by cross-reactive monoclonal antibodies. *Nat. Commun.* **12**, 1715  
860 (2021).



- 861 63. Pinto, D. *et al.* Broad betacoronavirus neutralization by a stem helix-specific human  
862 antibody. *Science* **373**, 1109-1116 (2021).
- 863 64. Hurlburt, N. K. *et al.* Structural definition of a pan-sarbecovirus neutralizing epitope on  
864 the spike S2 subunit. *Commun. Biol.* **5**, 342 (2022).
- 865 65. Zhou, P. *et al.* Broadly neutralizing anti-S2 antibodies protect against all three human  
866 betacoronaviruses that cause severe disease. *bioRxiv*, doi:10.1101/2022.03.04.479488  
867 (2022).
- 868 66. Kirchdoerfer, R. N. *et al.* Stabilized coronavirus spikes are resistant to conformational  
869 changes induced by receptor recognition or proteolysis. *Sci. Rep.* **8**, 15701 (2018).
- 870 67. Pardi, N., Hogan, M. J., Porter, F. W. & Weissman, D. mRNA vaccines—a new era in  
871 vaccinology. *Nat. Rev. Drug Discov.* **17**, 261-279 (2018).
- 872 68. Wu, F. *et al.* A new coronavirus associated with human respiratory disease in China.  
873 *Nature* **579**, 265-269 (2020).
- 874 69. Hoffmann, M., Kleine-Weber, H. & Pöhlmann, S. A multibasic cleavage site in the spike  
875 protein of SARS-CoV-2 is essential for infection of human lung cells. *Mol. Cell* **78**, 779-  
876 784.e5 (2020).
- 877 70. Olson, C. A., Wu, N. C. & Sun, R. A comprehensive biophysical description of pairwise  
878 epistasis throughout an entire protein domain. *Curr. Biol.* **24**, 2643-2651 (2014).
- 879 71. Yan, R. *et al.* Structural basis for the recognition of SARS-CoV-2 by full-length human  
880 ACE2. *Science* **367**, 1444-1448 (2020).
- 881 72. Zhang, J., Kobert, K., Flouri, T. & Stamatakis, A. PEAR: a fast and accurate Illumina  
882 Paired-End reAd mergeR. *Bioinformatics* **30**, 614-620 (2014).
- 883 73. Ream, D. & Kiss, A. J. NCBI/GenBank BLAST Output XML Parser Tool. (2013).
- 884 74. Katoh, K., Misawa, K., Kuma, K. i. & Miyata, T. MAFFT: a novel method for rapid  
885 multiple sequence alignment based on fast Fourier transform. *Nucleic Acids Res.* **30**,  
886 3059-3066 (2002).
- 887 75. Mastronarde, D. N. Automated electron microscope tomography using robust prediction  
888 of specimen movements. *J. Struct. Biol.* **152**, 36-51 (2005).
- 889 76. Punjani, A., Rubinstein, J. L., Fleet, D. J. & Brubaker, M. A. cryoSPARC: algorithms for  
890 rapid unsupervised cryo-EM structure determination. *Nat. Methods* **14**, 290-296 (2017).
- 891 77. Rodrigues, J. P., Teixeira, J. M., Trellet, M. & Bonvin, A. M. pdb-tools: a swiss army knife  
892 for molecular structures. *F1000Research* **7**, 1961 (2018).
- 893 78. Conway, P., Tyka, M. D., DiMaio, F., Kondering, D. E. & Baker, D. Relaxation of  
894 backbone bond geometry improves protein energy landscape modeling. *Protein Sci.* **23**,  
895 47-55 (2014).  
896
