# Supplementary material for: High-throughput identification of prefusion-stabilizing mutations in SARS-CoV-2 spike
Source: PubMed Central journal article supplement — bioRxiv. 2022 Sep 26:2022.09.24.509341. Preprint. [Version 1] doi: 10.1101/2022.09.24.509341 (PMC9536033; doi:10.1101/2022.09.24.509341), 2022-09-26
Supplement: media-1.pdf [file media-1.pdf]

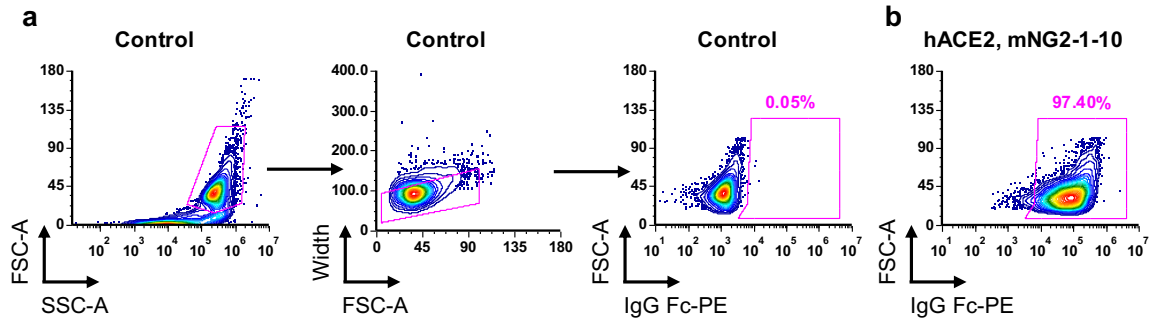

1

2 **Supplementary Fig. 1 | Validation of hACE2, mNG2<sub>1-10</sub>-expressing cell line. a,b,** Flow  
 3 cytometry plots showing (a) untransfected control and gating strategy in this verification  
 4 experiment, and (b) surface expression of hACE2 in HEK293T landing pad cells.

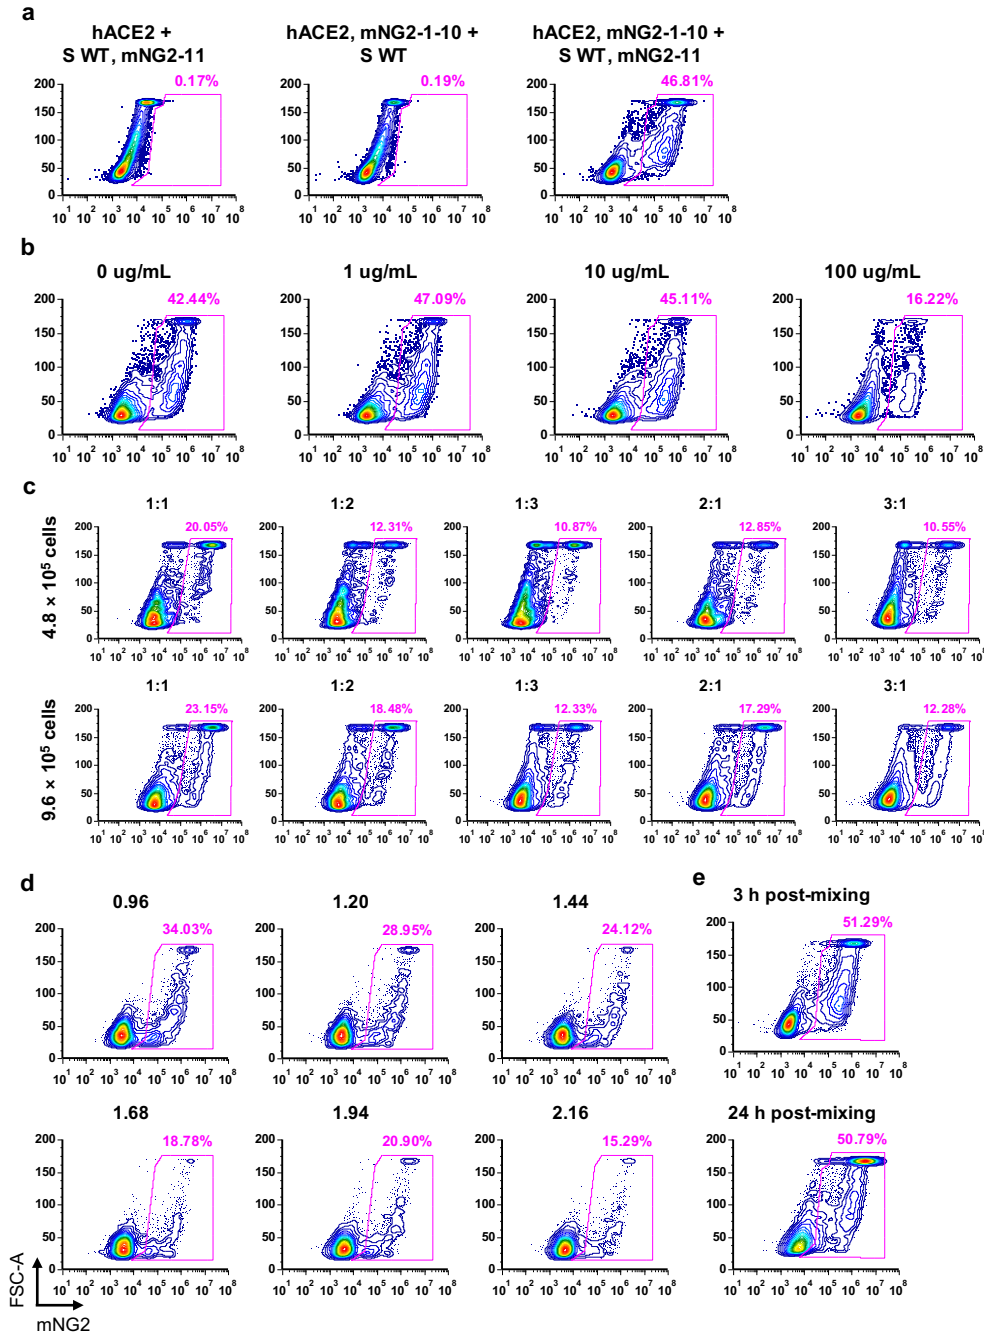

5

6 **Supplementary Fig. 2 | Validation and optimization of fusion assay.**

7 of fusion assay between hACE2- and S-expressing cells showing detectable green fluorescence  
 8 when both mNG2<sub>1-10</sub> and mNG2<sub>11</sub> were expressed, and negligible fluorescent background signal  
 9 when either mNG2<sub>1-10</sub> or mNG2<sub>11</sub> was expressed. **b**, Addition of CC40.8, a neutralizing antibody  
 10 targeting the stem helix, to S, mNG2<sub>11</sub>-expressing cells one hour prior to mixing with hACE2,

11 mNG2<sub>1-10</sub><sup>-</sup>-expressing cells decreased fusion events. Antibody concentration is indicated above  
12 each plot. **c**, Optimization of the ratio between hACE2, mNG2<sub>1-10</sub><sup>-</sup> and S, mNG2<sub>11</sub>-expressing cells  
13 for fusion assay. Total cell number in co-culture is indicated, and the ratio of hACE2, mNG2<sub>1-10</sub><sup>-</sup>  
14 to S, mNG2<sub>11</sub>-expressing cells is shown above each plot. **d**, Optimization of total cell numbers of  
15 hACE2, mNG2<sub>1-10</sub><sup>-</sup> and S, mNG2<sub>11</sub>-expressing cells for fusion assay. Total cell number, in millions,  
16 of hACE2, mNG2<sub>1-10</sub><sup>-</sup> and S, mNG2<sub>11</sub>-expressing cells in co-culture is shown above each plot.  
17 Equal numbers of hACE2, mNG2<sub>1-10</sub><sup>-</sup> and S, mNG2<sub>11</sub>-expressing cells were co-cultured for 3  
18 hours. **e**, Optimization of time point for fusion sorting. Equal numbers of hACE2, mNG2<sub>1-10</sub><sup>-</sup> and  
19 S, mNG2<sub>11</sub>-expressing cells totaling  $5.0 \times 10^5$  cells/mL were mixed and analyzed via flow  
20 cytometry at the indicated time point.

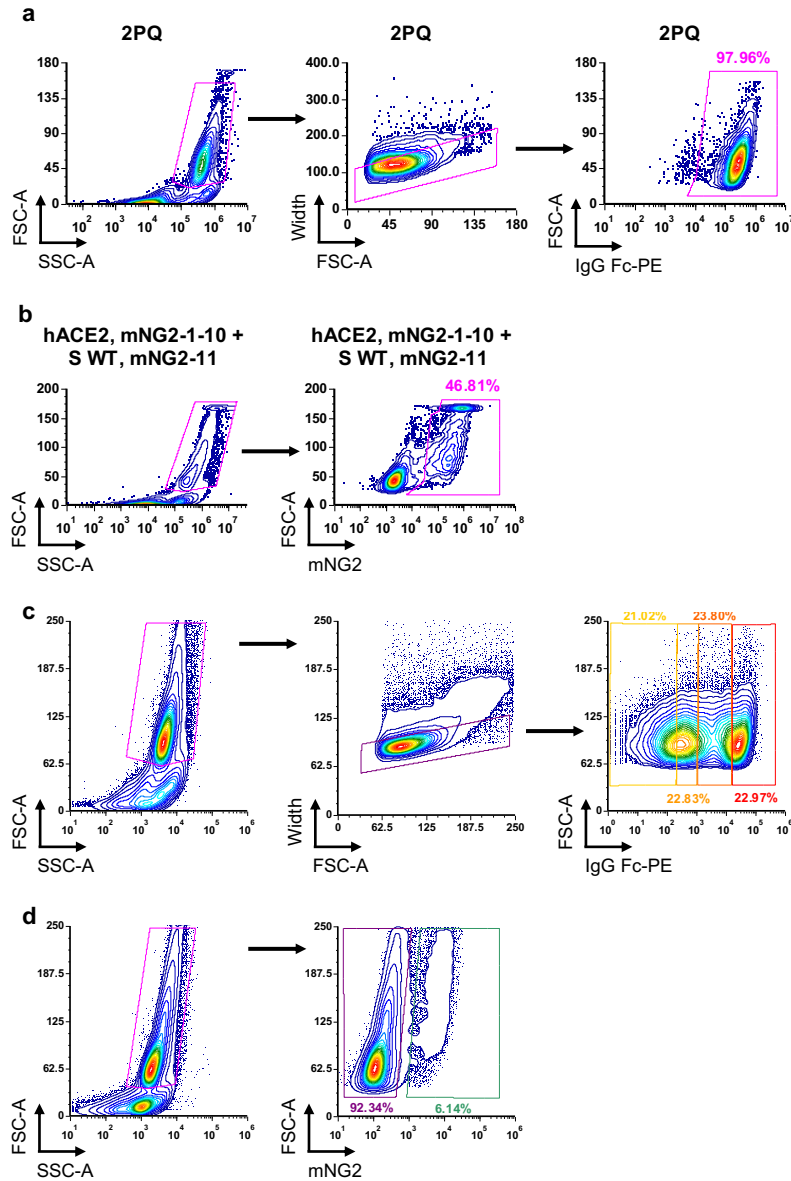

21

22 **Supplementary Fig. 3 | Gating strategies for flow cytometry and fluorescence activated**

23 **cell sorting (FACS).** **a**, Gating strategy used for flow cytometry to assess surface expression of

24 S via PE fluorescence. **b**, Gating strategy used for flow cytometry to determine fusion of hACE2-

25 and S-expressing cells via mNG2 fluorescence. **c**, Gating strategy used for FACS to sort the

26 DMS library of S-expressing cells based on levels of PE fluorescence. **d**, Gating strategy used

27 for FACS to sort the co-culture of the DMS library of S-expressing cells and hACE2-expressing

28 cells at 3 hours post-mixing, based on presence or absence of mNG2 fluorescence.

29 **Supplementary Table 2.** Primers used for PCR-based site directed mutagenesis (QuikChange)  
 30 to generate mutations. The plasmid backbone used was attB-S-mNG2-11.

| <b>Primer</b> | <b>Sequence (5' to 3')</b>            |
|---------------|---------------------------------------|
| T961F-F       | GCACTGAACTTCCTGGTCAAGCAGCTGTCC        |
| T961F-R       | CAGCTGCTTGACCAGGAAGTTCAGTGCCTGGGC     |
| K986P-F       | CTGAGCAGACTGGACCCGGTGGAAAGCCGAGGTGCAG |
| K986P-R       | CTGCACCTCGGCTTCCACCGGGTCCAGTCTGCTCAG  |
| V987P-F       | CTGAGCAGACTGGACAAGCCGGAAGCCGAGGTGCAG  |
| V987P-R       | CTGCACCTCGGCTTCCGGCTTGTCCAGTCTGCTCAG  |
| D994E-F       | CGAGGTGCAGATCGAGAGACTGATCACCGGAAG     |
| D994E-R       | CTTCCGGTGATCAGTCTCTCGATCTGCACCTCGGCT  |
| D994Q-F       | GCCGAGGTGCAGATCCAGAGACTGATCACCGGAAG   |
| D994Q-R       | CTTCCGGTGATCAGTCTCTGGATCTGCACCTCGGCT  |
| Q1005R-F      | GGCTGCAGTCCCTGCGGACCTACGTTACCCAG      |
| Q1005R-R      | CTGGGTAACGTAGGTCCGCAGGGACTGCAGCC      |
| K986P/V987P-F | CTGAGCAGACTGGACCCGCCGGAAGCCGAGGTGCAG  |
| K986P/V987P-R | CTGCACCTCGGCTTCCGGCGGGTCCAGTCTGCTCAG  |

31

32 **Supplementary Table 3.** Cassette primers to generate the DMS library.

| <b>Primer</b> | <b>Sequence (5' to 3')</b>                                        |
|---------------|-------------------------------------------------------------------|
| Cassette1_1   | GCCCTGCTGGCCGGCACAATCNNKAGTGGTTGGACATTTGGAGCTGG<br>CGCCGCTCTGCAG  |
| Cassette1_2   | GCCCTGCTGGCCGGCACAATCACCNNKGGCTGGACCTTTGGAGCTG<br>GCGCCGCTCTGCAG  |
| Cassette1_3   | GCCCTGCTGGCCGGCACAATCACCAGCNNKTGGACATTCGGAGCTG<br>GCGCCGCTCTGCAG  |
| Cassette1_4   | GCCCTGCTGGCCGGCACAATCACAAGCGGTNNKACCTTTGGAGCTGG<br>CGCCGCTCTGCAG  |
| Cassette1_5   | GCCCTGCTGGCCGGCACAATCACAAGTGGCTGGNNKTTTCGGAGCTG<br>GCGCCGCTCTGCAG |
| Cassette1_6   | GCCCTGCTGGCCGGCACAATCACCAGCGGTTGGACNNKGGTGCTG<br>GCGCCGCTCTGCAG   |
| Cassette1_7   | GCCCTGCTGGCCGGCACAATCACCAGCGGTTGGACATTTNNKGCAGG<br>CGCCGCTCTGCAG  |
| Cassette1_8   | GCCCTGCTGGCCGGCACAATCACCAGTGGTTGGACCTTCGGANNKG<br>GCGCCGCTCTGCAG  |
| Cassette2_1   | AGCGGCTGGACATTTGGAGCTNNKGCAGCACTGCAGATCCCCTTTGC<br>TATGCAGATGGCC  |
| Cassette2_2   | AGCGGCTGGACATTTGGAGCTGGTNNKGCTCTCCAGATCCCCTTTGC<br>TATGCAGATGGCC  |
| Cassette2_3   | AGCGGCTGGACATTTGGAGCTGGTGCCNNKCTGCAAATCCCCTTTGC<br>TATGCAGATGGCC  |
| Cassette2_4   | AGCGGCTGGACATTTGGAGCTGGCGCAGCTNNKCAAATCCCCTTTGC<br>TATGCAGATGGCC  |
| Cassette2_5   | AGCGGCTGGACATTTGGAGCTGGCGCCGCACTCNNKATCCCCTTTGC<br>TATGCAGATGGCC  |
| Cassette2_6   | AGCGGCTGGACATTTGGAGCTGGTGCAGCACTCCAANNKCCCTTTGC<br>TATGCAGATGGCC  |
| Cassette2_7   | AGCGGCTGGACATTTGGAGCTGGTGCAGCTCTGCAAATANNKTTTGC<br>TATGCAGATGGCC  |
| Cassette2_8   | AGCGGCTGGACATTTGGAGCTGGTGCCGCACTCCAGATACCCNNKGC<br>TATGCAGATGGCC  |
| Cassette3_1   | GCCGCTCTGCAGATCCCCTTTNNKATGCAAATGGCATAACGGTTCAAC<br>GGCATCGGAGTG  |
| Cassette3_2   | GCCGCTCTGCAGATCCCCTTTGCANNKCAAATGGCCTATCGGTTCAAC<br>GGCATCGGAGTG  |
| Cassette3_3   | GCCGCTCTGCAGATCCCCTTTGCAATGNNKATGGCATATCGATTCAAC<br>GGCATCGGAGTG  |
| Cassette3_4   | GCCGCTCTGCAGATCCCCTTTGCTATGCAGNNKGCATATCGGTTCAAC<br>GGCATCGGAGTG  |
| Cassette3_5   | GCCGCTCTGCAGATCCCCTTTGCAATGCAAATGNNKTACCGATTAAAC<br>GGCATCGGAGTG  |
| Cassette3_6   | GCCGCTCTGCAGATCCCCTTTGCTATGCAAATGGCCNNKCGATTCAAC<br>GGCATCGGAGTG  |
| Cassette3_7   | GCCGCTCTGCAGATCCCCTTTGCAATGCAGATGGCCTATNNKTTTAAAC<br>GGCATCGGAGTG |

Cassette3\_8 GCCGCTCTGCAGATCCCCTTTGCTATGCAGATGGCATAACCGANNKAA  
 CGGCATCGGAGTG  
 Cassette4\_1 ATGCAGATGGCCTACCGGTTCNNKGGTATAGGAGTGACCCAGAATGT  
 GCTGTACGAGAAC  
 Cassette4\_2 ATGCAGATGGCCTACCGGTTCAATNNKATCGGTGTGACCCAGAATGT  
 GCTGTACGAGAAC  
 Cassette4\_3 ATGCAGATGGCCTACCGGTTCAACGGTNNKGGTGTAAACCCAGAATGT  
 GCTGTACGAGAAC  
 Cassette4\_4 ATGCAGATGGCCTACCGGTTCAATGGCATANNKGTAACCCAGAATGT  
 GCTGTACGAGAAC  
 Cassette4\_5 ATGCAGATGGCCTACCGGTTCAACGGTATCGGANNKACACAGAATGT  
 GCTGTACGAGAAC  
 Cassette4\_6 ATGCAGATGGCCTACCGGTTCAACGGCATAGGTGTGNNKCAGAATGT  
 GCTGTACGAGAAC  
 Cassette4\_7 ATGCAGATGGCCTACCGGTTCAATGGTATCGGAGTAACNNKAATGT  
 GCTGTACGAGAAC  
 Cassette4\_8 ATGCAGATGGCCTACCGGTTCAACGGCATCGGTGTAAACACAGNNKGT  
 GCTGTACGAGAAC  
 Cassette5\_1 GGCATCGGAGTGACCCAGAATNNKCTCTATGAGAACCAGAAGCTGAT  
 CGCCAACCAGTTC  
 Cassette5\_2 GGCATCGGAGTGACCCAGAATGTANNKTACGAAAACCAGAAGCTGAT  
 CGCCAACCAGTTC  
 Cassette5\_3 GGCATCGGAGTGACCCAGAATGTACTGNNKGAGAATCAGAAGCTGAT  
 CGCCAACCAGTTC  
 Cassette5\_4 GGCATCGGAGTGACCCAGAATGTGCTCTACNNKAATCAGAAGCTGAT  
 CGCCAACCAGTTC  
 Cassette5\_5 GGCATCGGAGTGACCCAGAATGTGCTGTATGAANNKCAGAAGCTGAT  
 CGCCAACCAGTTC  
 Cassette5\_6 GGCATCGGAGTGACCCAGAATGTACTCTATGAAAATNNKAAGCTGATC  
 GCCAACCAGTTC  
 Cassette5\_7 GGCATCGGAGTGACCCAGAATGTACTCTACGAGAACCAANNKCTGAT  
 CGCCAACCAGTTC  
 Cassette5\_8 GGCATCGGAGTGACCCAGAATGTACTGTATGAGAACCAAAAGNNKAT  
 CGCCAACCAGTTC  
 Cassette6\_1 CTGTACGAGAACCAGAAGCTGNNKGCAAATCAGTTCAACAGCGCCAT  
 CGGCAAGATCCAG  
 Cassette6\_2 CTGTACGAGAACCAGAAGCTGATANNKAACCAATTCAACAGCGCCATC  
 GGCAAGATCCAG  
 Cassette6\_3 CTGTACGAGAACCAGAAGCTGATCGCANNKCAATTTAACAGCGCCATC  
 GGCAAGATCCAG  
 Cassette6\_4 CTGTACGAGAACCAGAAGCTGATAGCCAATNNKTTTAACAGCGCCATC  
 GGCAAGATCCAG  
 Cassette6\_5 CTGTACGAGAACCAGAAGCTGATCGCAAACCAGNNKAATAGCGCCAT  
 CGGCAAGATCCAG  
 Cassette6\_6 CTGTACGAGAACCAGAAGCTGATCGCCAATCAATTCNNKAGCGCCAT  
 CGGCAAGATCCAG  
 Cassette6\_7 CTGTACGAGAACCAGAAGCTGATAGCAAACCAGTTTAACNNKGCCATC  
 GGCAAGATCCAG  
 Cassette6\_8 CTGTACGAGAACCAGAAGCTGATCGCCAACCAATTTAATAGCNNKATC  
 GGCAAGATCCAG

Cassette7\_1 GCCAACCAGTTCAACAGCGCCNNKGGTAAAATCCAGGACAGCCTGAG  
 CAGCACAGCAAGC  
 Cassette7\_2 GCCAACCAGTTCAACAGCGCCATANNKAAGATACAGGACAGCCTGAG  
 CAGCACAGCAAGC  
 Cassette7\_3 GCCAACCAGTTCAACAGCGCCATCGGTNNKATACAAGACAGCCTGAG  
 CAGCACAGCAAGC  
 Cassette7\_4 GCCAACCAGTTCAACAGCGCCATAGGCAAANNKCAAGACAGCCTGAG  
 CAGCACAGCAAGC  
 Cassette7\_5 GCCAACCAGTTCAACAGCGCCATCGGTAAGATCANNKGATAGCCTGAG  
 CAGCACAGCAAGC  
 Cassette7\_6 GCCAACCAGTTCAACAGCGCCATCGGCAAATACAGNNKAGCCTGAG  
 CAGCACAGCAAGC  
 Cassette7\_7 GCCAACCAGTTCAACAGCGCCATAGGTAAGATCCAAGACNNKCTGAG  
 CAGCACAGCAAGC  
 Cassette7\_8 GCCAACCAGTTCAACAGCGCCATCGGCAAGATACAAGATAGCANNKAG  
 CAGCACAGCAAGC  
 Cassette8\_1 GGCAAGATCCAGGACAGCCTGNNKAGTACCGCAAGCGCCCTGGGAA  
 AGCTGCAGGACGTG  
 Cassette8\_2 GGCAAGATCCAGGACAGCCTGAGTNNKACAGCCAGCGCCCTGGGAA  
 AGCTGCAGGACGTG  
 Cassette8\_3 GGCAAGATCCAGGACAGCCTGAGCAGCANNKGCCAGTGCCCTGGGAA  
 AGCTGCAGGACGTG  
 Cassette8\_4 GGCAAGATCCAGGACAGCCTGAGCAGCACCNNKAGCGCACTGGGAA  
 AGCTGCAGGACGTG  
 Cassette8\_5 GGCAAGATCCAGGACAGCCTGAGCAGTACAGCANNKGCAGCTGGGAAA  
 GCTGCAGGACGTG  
 Cassette8\_6 GGCAAGATCCAGGACAGCCTGAGTAGCACCGCAAGTNNKCTGGGAAA  
 GCTGCAGGACGTG  
 Cassette8\_7 GGCAAGATCCAGGACAGCCTGAGTAGTACCGCCAGTGCCNNKGGAAA  
 GCTGCAGGACGTG  
 Cassette8\_8 GGCAAGATCCAGGACAGCCTGAGTAGTACAGCAAGTGCCCTGNNKAA  
 GCTGCAGGACGTG  
 Cassette9\_1 AGCACAGCAAGCGCCCTGGGANNKCTCCAAGACGTGGTCAACCAGAA  
 TGCCCAGGCACTG  
 Cassette9\_2 AGCACAGCAAGCGCCCTGGGAAAANNKCAGGATGTGGTCAACCAGAA  
 TGCCCAGGCACTG  
 Cassette9\_3 AGCACAGCAAGCGCCCTGGGAAAGCTCANNKGATGTAGTCAACCAGAA  
 TGCCCAGGCACTG  
 Cassette9\_4 AGCACAGCAAGCGCCCTGGGAAAAGCTGCAANNKGTAGTCAACCAGAA  
 TGCCCAGGCACTG  
 Cassette9\_5 AGCACAGCAAGCGCCCTGGGAAAGCTCCAGGACNNKGTAACCAGAA  
 TGCCCAGGCACTG  
 Cassette9\_6 AGCACAGCAAGCGCCCTGGGAAAGCTGCAAGATGTGNNKAACCAGAA  
 TGCCCAGGCACTG  
 Cassette9\_7 AGCACAGCAAGCGCCCTGGGAAAAGCTCCAGGACGTAGTCANNKCAGAA  
 TGCCCAGGCACTG  
 Cassette9\_8 AGCACAGCAAGCGCCCTGGGAAAGCTGCAAGACGTAGTAAACNNKAA  
 TGCCCAGGCACTG  
 Cassette10\_1 CTGCAGGACGTGGTCAACCAGNNKGCACAAGCACTGAACACCCTGGT  
 CAAGCAGCTGTCC



Cassette10\_2 CTGCAGGACGTGGTCAACCAGAACNNKCAGGCCCTGAACACCCTGGT  
 CAAGCAGCTGTCC  
 Cassette10\_3 CTGCAGGACGTGGTCAACCAGAACGCCNNKGCCTCAACACCCTGGT  
 CAAGCAGCTGTCC  
 Cassette10\_4 CTGCAGGACGTGGTCAACCAGAATGCACAGNNKCTCAACACCCTGGT  
 CAAGCAGCTGTCC  
 Cassette10\_5 CTGCAGGACGTGGTCAACCAGAATGCCCAAGCCNNKAACACCCTGGT  
 CAAGCAGCTGTCC  
 Cassette10\_6 CTGCAGGACGTGGTCAACCAGAACGCACAAGCCCTCNNKACCCTGGT  
 CAAGCAGCTGTCC  
 Cassette10\_7 CTGCAGGACGTGGTCAACCAGAACGCACAGGCACTCAATNNKCTGGT  
 CAAGCAGCTGTCC  
 Cassette10\_8 CTGCAGGACGTGGTCAACCAGAACGCCCAAGCACTGAATACCNNKGT  
 CAAGCAGCTGTCC  
 Cassette11\_1 GCCCAGGCACTGAACACCCTGNNKAAACAACCTGTCTCCAACCTTCGG  
 CGCCATCAGCTCT  
 Cassette11\_2 GCCCAGGCACTGAACACCCTGGTANNKCAGCTCTCTCCAACCTTCGG  
 CGCCATCAGCTCT  
 Cassette11\_3 GCCCAGGCACTGAACACCCTGGTAAAGNNKCTGTCTTCCAACCTTCGG  
 CGCCATCAGCTCT  
 Cassette11\_4 GCCCAGGCACTGAACACCCTGGTCAAACAGNNKTCTTCCAACCTTCGG  
 CGCCATCAGCTCT  
 Cassette11\_5 GCCCAGGCACTGAACACCCTGGTCAAGCAACTCNNKTCCAACCTTCGG  
 CGCCATCAGCTCT  
 Cassette11\_6 GCCCAGGCACTGAACACCCTGGTAAAACAACCTCTCTNNKAACCTTCGG  
 CGCCATCAGCTCT  
 Cassette11\_7 GCCCAGGCACTGAACACCCTGGTAAAGCAACTCTCTCTNNKTTCGG  
 CGCCATCAGCTCT  
 Cassette11\_8 GCCCAGGCACTGAACACCCTGGTAAAGCAGCTCTCTTCTAACNNKGG  
 CGCCATCAGCTCT  
 Cassette12\_1 AAGCAGCTGTCTCCAACCTCNNKGCAATAAGCTCTGTGCTGAACGAT  
 ATCCTGAGCAGA  
 Cassette12\_2 AAGCAGCTGTCTCCAACCTTCGGTNNKATCAGTTCTGTGCTGAACGAT  
 ATCCTGAGCAGA  
 Cassette12\_3 AAGCAGCTGTCTCCAACCTTCGGTGCCNNKAGCTCGGTGCTGAACGA  
 TATCCTGAGCAGA  
 Cassette12\_4 AAGCAGCTGTCTCCAACCTTCGGCGCAATCNNKTCCGGTGTGCTGAACGA  
 TATCCTGAGCAGA  
 Cassette12\_5 AAGCAGCTGTCTCCAACCTTCGGCGCCATAAGTNNKGTGCTGAACGA  
 TATCCTGAGCAGA  
 Cassette12\_6 AAGCAGCTGTCTCCAACCTTCGGTGCAATAAGTTCGNNKCTGAACGAT  
 ATCCTGAGCAGA  
 Cassette12\_7 AAGCAGCTGTCTCCAACCTTCGGTGCAATCAGCTCTGTANNKAACGAT  
 ATCCTGAGCAGA  
 Cassette12\_8 AAGCAGCTGTCTCCAACCTTCGGTGCCATCAGTTCCGGTACTGNNKGAT  
 ATCCTGAGCAGA  
 Cassette13\_1 GCCATCAGCTCTGTGCTGAACNNKATACTCAGCAGACTGGACAAGGT  
 GGAAGCCGAGGTG  
 Cassette13\_2 GCCATCAGCTCTGTGCTGAACGACNNKCTGAGTAGACTGGACAAGGT  
 GGAAGCCGAGGTG

Cassette13\_3 GCCATCAGCTCTGTGCTGAACGATATCNNKAGTAGGCTGGACAAGGT  
 GGAAGCCGAGGTG  
 Cassette13\_4 GCCATCAGCTCTGTGCTGAACGATATCCTCNNKAGACTCGACAAGGT  
 GGAAGCCGAGGTG  
 Cassette13\_5 GCCATCAGCTCTGTGCTGAACGATATACTGAGCNNKCTCGACAAGGT  
 GGAAGCCGAGGTG  
 Cassette13\_6 GCCATCAGCTCTGTGCTGAACGACATCCTCAGCAGGNNKGACAAGGT  
 GGAAGCCGAGGTG  
 Cassette13\_7 GCCATCAGCTCTGTGCTGAACGACATACTCAGTAGGCTGNNKAAGGT  
 GGAAGCCGAGGTG  
 Cassette13\_8 GCCATCAGCTCTGTGCTGAACGACATACTGAGCAGGCTGGACNNKGT  
 GGAAGCCGAGGTG  
 Cassette14\_1 ATCCTGAGCAGACTGGACAAGNNKGAGGCAGAGGTGCAGATCGACA  
 GACTGATCACCGGA  
 Cassette14\_2 ATCCTGAGCAGACTGGACAAGGTANNKGCCGAAGTGCAGATCGACAG  
 ACTGATCACCGGA  
 Cassette14\_3 ATCCTGAGCAGACTGGACAAGGTAGAANNKGAGGTACAGATCGACAG  
 ACTGATCACCGGA  
 Cassette14\_4 ATCCTGAGCAGACTGGACAAGGTGGAGGCCNNKGTACAGATCGACAG  
 ACTGATCACCGGA  
 Cassette14\_5 ATCCTGAGCAGACTGGACAAGGTGGAAGCAGAANNKCAGATCGACAG  
 ACTGATCACCGGA  
 Cassette14\_6 ATCCTGAGCAGACTGGACAAGGTAGAGGCAGAAGTANNKATCGACAG  
 ACTGATCACCGGA  
 Cassette14\_7 ATCCTGAGCAGACTGGACAAGGTAGAGGCCGAGGTACAANNKGACAG  
 ACTGATCACCGGA  
 Cassette14\_8 ATCCTGAGCAGACTGGACAAGGTAGAAGCAGAGGTGCAAATCNNKAG  
 ACTGATCACCGGA  
 Cassette15\_1 GAAGCCGAGGTGCAGATCGACNNKCTCATAACCGGAAGGCTGCAGTC  
 CCTGCAGACCTAC  
 Cassette15\_2 GAAGCCGAGGTGCAGATCGACAGGNNKATCACAGGAAGGCTGCAGT  
 CCCTGCAGACCTAC  
 Cassette15\_3 GAAGCCGAGGTGCAGATCGACAGGCTGNNKACCGGTAGGCTGCAGT  
 CCCTGCAGACCTAC  
 Cassette15\_4 GAAGCCGAGGTGCAGATCGACAGACTCATCNNKGGTAGGCTGCAGTC  
 CCTGCAGACCTAC  
 Cassette15\_5 GAAGCCGAGGTGCAGATCGACAGACTGATAACANNKAGGCTGCAGTC  
 CCTGCAGACCTAC  
 Cassette15\_6 GAAGCCGAGGTGCAGATCGACAGGCTCATAACAGGTNNKCTGCAGTC  
 CCTGCAGACCTAC  
 Cassette15\_7 GAAGCCGAGGTGCAGATCGACAGGCTCATCACCGGTAGANNKCAGTC  
 CCTGCAGACCTAC  
 Cassette15\_8 GAAGCCGAGGTGCAGATCGACAGGCTGATCACCGGAAGACTGNNKTC  
 CCTGCAGACCTAC  
 Cassette16\_1 CTGATCACCGGAAGGCTGCAGNNKCTCCAAACCTACGTTACCCAGCA  
 GCTGATCAGAGCC  
 Cassette16\_2 CTGATCACCGGAAGGCTGCAGTCTNNKCAGACATACGTTACCCAGCA  
 GCTGATCAGAGCC  
 Cassette16\_3 CTGATCACCGGAAGGCTGCAGTCTCTGNNKACCTATGTTACCCAGCA  
 GCTGATCAGAGCC

Cassette16\_4 CTGATCACCGGAAGGCTGCAGTCCCTCCAGNNKTATGTTACCCAGCA  
 GCTGATCAGAGCC  
 Cassette16\_5 CTGATCACCGGAAGGCTGCAGTCCCTGCAAACANNKGTTACCCAGCA  
 GCTGATCAGAGCC  
 Cassette16\_6 CTGATCACCGGAAGGCTGCAGTCTCTCAAACATATNNKACCCAGCA  
 GCTGATCAGAGCC  
 Cassette16\_7 CTGATCACCGGAAGGCTGCAGTCTCTCCAGACCTATGTANNKCAGCA  
 GCTGATCAGAGCC  
 Cassette16\_8 CTGATCACCGGAAGGCTGCAGTCTCTGCAAACCTACGTAACCNKCA  
 GCTGATCAGAGCC  
 Cassette17\_1 CTGCAGACCTACGTTACCCAGNNKCTCATAAGAGCCGCCGAGATTAG  
 AGCCTCTGCCAAT  
 Cassette17\_2 CTGCAGACCTACGTTACCCAGCAANNKATCAGGGCCGCCGAGATTAG  
 AGCCTCTGCCAAT  
 Cassette17\_3 CTGCAGACCTACGTTACCCAGCAACTGNNKAGAGCAGCCGAGATTAG  
 AGCCTCTGCCAAT  
 Cassette17\_4 CTGCAGACCTACGTTACCCAGCAGCTCATCNNKGCAGCCGAGATTAG  
 AGCCTCTGCCAAT  
 Cassette17\_5 CTGCAGACCTACGTTACCCAGCAGCTGATAAGGNNKGCCGAGATTAG  
 AGCCTCTGCCAAT  
 Cassette17\_6 CTGCAGACCTACGTTACCCAGCAACTCATAAGGGCANNKGAGATTAG  
 AGCCTCTGCCAAT  
 Cassette17\_7 CTGCAGACCTACGTTACCCAGCAACTCATCAGAGCAGCANNKATTAGA  
 GCCTCTGCCAAT  
 Cassette17\_8 CTGCAGACCTACGTTACCCAGCAACTGATCAGGGCAGCAGAGNNKAG  
 AGCCTCTGCCAAT  
 Cassette18\_1 CTGATCAGAGCCGCCGAGATTNNKGCATCGGCCAATCTGGCCGCCAC  
 CAAGATGTCTGAG  
 Cassette18\_2 CTGATCAGAGCCGCCGAGATTAGGNNKTCTGCAAATCTGGCCGCCAC  
 CAAGATGTCTGAG  
 Cassette18\_3 CTGATCAGAGCCGCCGAGATTAGGGCCNNKGCCAACCTGGCCGCCA  
 CCAAGATGTCTGAG  
 Cassette18\_4 CTGATCAGAGCCGCCGAGATTAGAGCATCTNNKAACCTGGCCGCCAC  
 CAAGATGTCTGAG  
 Cassette18\_5 CTGATCAGAGCCGCCGAGATTAGAGCCTCGGCANNKCTGGCCGCCA  
 CCAAGATGTCTGAG  
 Cassette18\_6 CTGATCAGAGCCGCCGAGATTAGGGCATCGGCAAACNNKGCCGCCA  
 CCAAGATGTCTGAG  
 Cassette18\_7 CTGATCAGAGCCGCCGAGATTAGGGCATCTGCCAACCTCNNKGCCAC  
 CAAGATGTCTGAG  
 Cassette18\_8 CTGATCAGAGCCGCCGAGATTAGGGCCTCTGCAAACCTCGCCNNKAC  
 CAAGATGTCTGAG  
 Cassette19\_1 GCCTCTGCCAATCTGGCCGCCNNKAAAATGTCGGAGTGTGTGCTGGG  
 CCAGAGCAAGAGA  
 Cassette19\_2 GCCTCTGCCAATCTGGCCGCCACANNKATGTCTGAATGTGTGCTGGG  
 CCAGAGCAAGAGA  
 Cassette19\_3 GCCTCTGCCAATCTGGCCGCCACCAAGNNKTCGGAATGTGTGCTGGG  
 CCAGAGCAAGAGA  
 Cassette19\_4 GCCTCTGCCAATCTGGCCGCCACAAAATGNNKGAATGCGTGCTGGG  
 CCAGAGCAAGAGA

|                        |                                                                  |
|------------------------|------------------------------------------------------------------|
| Cassette19_5           | GCCTCTGCCAATCTGGCCGCCACAAAGATGTCGNNKTGCGTGCTGGG<br>CCAGAGCAAGAGA |
| Cassette19_6           | GCCTCTGCCAATCTGGCCGCCACCAAGATGTCTGAANNKGTACTGGG<br>CCAGAGCAAGAGA |
| Cassette19_7           | GCCTCTGCCAATCTGGCCGCCACAAAATGTCTGAGTGCNNKCTGGG<br>CCAGAGCAAGAGA  |
| Cassette19_8           | GCCTCTGCCAATCTGGCCGCCACCAAGATGTCGGAGTGTGTANNKGG<br>CCAGAGCAAGAGA |
| Cassette1_Rpri<br>mer  | GATTGTGCCGGCCAGCAGGGC                                            |
| Cassette2_Rpri<br>mer  | AGCTCCAAATGTCCAGCCGCT                                            |
| Cassette3_Rpri<br>mer  | AAAGGGGATCTGCAGAGCGGC                                            |
| Cassette4_Rpri<br>mer  | GAACCGGTAGGCCATCTGCAT                                            |
| Cassette5_Rpri<br>mer  | ATTCTGGGTCACTCCGATGCC                                            |
| Cassette6_Rpri<br>mer  | CAGCTTCTGGTTCTCGTACAG                                            |
| Cassette7_Rpri<br>mer  | GGCGCTGTTGAACTGGTTGGC                                            |
| Cassette8_Rpri<br>mer  | CAGGCTGTCCTGGATCTTGCC                                            |
| Cassette9_Rpri<br>mer  | TCCCAGGGCGCTTGCTGTGCT                                            |
| Cassette10_Rp<br>rimer | CTGGTTGACCACGTCTGCAG                                             |
| Cassette11_Rp<br>rimer | CAGGGTGTTTCAGTGCCTGGGC                                           |
| Cassette12_Rp<br>rimer | GAAGTTGGAGGACAGCTGCTT                                            |
| Cassette13_Rp<br>rimer | G TTCAGCACAGAGCTGATGGC                                           |
| Cassette14_Rp<br>rimer | CTTGTCCAGTCTGCTCAGGAT                                            |
| Cassette15_Rp<br>rimer | GTCGATCTGCACCTCGGCTTC                                            |
| Cassette16_Rp<br>rimer | CTGCAGCCTTCCGGTGATCAG                                            |
| Cassette17_Rp<br>rimer | CTGGGTAACGTAGGTCTGCAG                                            |
| Cassette18_Rp<br>rimer | AATCTCGGCGGCTCTGATCAG                                            |
| Cassette19_Rp<br>rimer | GGCGGCCAGATTGGCAGAGGC                                            |

34 **Supplementary Table 4.** Numbers of cells collected per bin in expression sorting.

| <b>Bin</b> | <b>Replicate 1</b> | <b>Replicate 2</b> | <b>Replicate 3</b> |
|------------|--------------------|--------------------|--------------------|
| Bin 0      | $8.03 \times 10^5$ | $1.30 \times 10^6$ | $1.70 \times 10^6$ |
| Bin 1      | $7.51 \times 10^5$ | $1.30 \times 10^6$ | $1.70 \times 10^6$ |
| Bin 2      | $7.70 \times 10^5$ | $1.30 \times 10^6$ | $1.70 \times 10^6$ |
| Bin 3      | $8.20 \times 10^5$ | $1.30 \times 10^6$ | $1.70 \times 10^6$ |

35

36 **Supplementary Table 5.** Numbers of cells collected per bin in fusion sorting.

| <b>Bin</b>        | <b>Replicate 1</b> | <b>Replicate 2</b> |
|-------------------|--------------------|--------------------|
| mNG2 <sup>-</sup> | $3.53 \times 10^6$ | $5.51 \times 10^6$ |
| mNG2 <sup>+</sup> | $1.84 \times 10^5$ | $4.87 \times 10^5$ |

37

38 **Supplementary Table 6.** *p*-values from Student's *t* test of expression and fusion scores  
 39 between mutation types. Data are related to **Extended Data Fig. 2c,d.**

| <b>Expression</b> |                        |                        |                        |
|-------------------|------------------------|------------------------|------------------------|
|                   | Missense               | Nonsense               | Silent                 |
| Missense          |                        | $6.46 \times 10^{-60}$ | $2.93 \times 10^{-2}$  |
| Nonsense          | $6.46 \times 10^{-60}$ |                        | $3.80 \times 10^{-44}$ |
| Silent            | $2.93 \times 10^{-2}$  | $3.80 \times 10^{-44}$ |                        |
| <b>Fusion</b>     |                        |                        |                        |
|                   | Missense               | Nonsense               | Silent                 |
| Missense          |                        | $3.10 \times 10^{-34}$ | $7.08 \times 10^{-4}$  |
| Nonsense          | $3.10 \times 10^{-34}$ |                        | $1.44 \times 10^{-31}$ |
| Silent            | $7.08 \times 10^{-4}$  | $1.44 \times 10^{-31}$ |                        |

40

41 **Supplementary Table 7.** Betacoronaviruses used for sequence conservation analysis. Data are  
 42 related to **Extended Data Fig. 3c,d.**

| Accession ID     | Database | Name                                                                                                                                                                    |
|------------------|----------|-------------------------------------------------------------------------------------------------------------------------------------------------------------------------|
| gb_MN908947.3_   | GenBank  | Severe acute respiratory syndrome coronavirus 2 isolate Wuhan-Hu-1, complete genome                                                                                     |
| gb_MN996532.2_   | GenBank  | Bat coronavirus RaTG13, complete genome                                                                                                                                 |
| gb_MZ937000.1_   | GenBank  | Bat coronavirus isolate BANAL-20-52/Laos/2020, complete genome                                                                                                          |
| EPI_ISL_410543   | GISAID   | hCoV-19/pangolin/Guangxi/P3B/2017                                                                                                                                       |
| EPI_ISL_471465   | GISAID   | hCoV-19/pangolin/Guangdong/cDNA20-S/2019                                                                                                                                |
| gb_MZ937003.1_   | GenBank  | Bat coronavirus isolate BANAL-20-236/Laos/2020, complete genome                                                                                                         |
| gb_MZ937001.1_   | GenBank  | Bat coronavirus isolate BANAL-20-103/Laos/2020, complete genome                                                                                                         |
| gb_MG772933.1_   | GenBank  | Bat SARS-like coronavirus isolate bat-SL-CoVZC45, complete genome                                                                                                       |
| gb_MG772934.1_   | GenBank  | Bat SARS-like coronavirus isolate bat-SL-CoVZXC21, complete genome                                                                                                      |
| gb_KT444582.1_   | GenBank  | SARS-like coronavirus WIV16, complete genome                                                                                                                            |
| gb_DQ497008.1_   | GenBank  | SARS coronavirus strain MA-15, complete genome                                                                                                                          |
| gb_KC881007.1_   | GenBank  | Bat SARS-like coronavirus WIV1 spike protein (S) gene, complete cds                                                                                                     |
| gb_KY417144.1_   | GenBank  | Bat SARS-like coronavirus isolate Rs4084, complete genome                                                                                                               |
| gb_DQ412042.1_   | GenBank  | Bat SARS coronavirus Rf1, complete genome                                                                                                                               |
| gb_KJ473813.1_   | GenBank  | BtRf-BetaCoV/SX2013, complete genome                                                                                                                                    |
| gb_KJ473815.1_   | GenBank  | BtRs-BetaCoV/GX2013, complete genome                                                                                                                                    |
| gb_KF294457.1_   | GenBank  | Bat SARS-like coronavirus isolate Longquan-140 orf1ab polyprotein, spike glycoprotein, envelope protein, membrane protein, and nucleocapsid protein genes, complete cds |
| gb_DQ022305.2_   | GenBank  | Bat SARS coronavirus HKU3-1, complete genome                                                                                                                            |
| gb_DQ071615.1_   | GenBank  | Bat SARS coronavirus Rp3, complete genome                                                                                                                               |
| gb_FJ588686.1_   | GenBank  | Bat SARS CoV Rs672/2006, complete genome                                                                                                                                |
| gb_KJ473814.1_   | GenBank  | BtRs-BetaCoV/HuB2013, complete genome                                                                                                                                   |
| gb_KF569996.1_   | GenBank  | <i>Rhinolophus affinis</i> coronavirus isolate LYRa11, complete genome                                                                                                  |
| gb_KY352407.1_   | GenBank  | Severe acute respiratory syndrome-related coronavirus strain BtKY72, complete genome                                                                                    |
| ref_NC_014470.1_ | GenBank  | Bat coronavirus BM48-31/BGR/2008, complete genome                                                                                                                       |
| gb_MZ937004.1_   | GenBank  | Bat coronavirus isolate BANAL-20-247/Laos/2020, complete genome                                                                                                         |
| gb_MZ937002.1_   | GenBank  | Bat coronavirus isolate BANAL-20-116/Laos/2020, complete genome                                                                                                         |
| EPI_ISL_412977   | GISAID   | hCoV-19/bat/Yunnan/RmYN02/2019                                                                                                                                          |

43
